# Supplementary material for: Genome-Wide Transcription During Early Wheat Meiosis Is Independent of Synapsis, Ploidy Level, and the Ph1 Locus
Source: Front Plant Sci. 2018 Dec 4;9:1791. doi: 10.3389/fpls.2018.01791 (PMC6288783; doi:10.3389/fpls.2018.01791)
Supplement: TABLE S1 — Number of cleaned reads generated and mapped for each sample. The RNA-seq data were aligned to the RefSeqv1.0 assembly using HISAT with strict mapping options to reduce the noise caused by reads mapping to the incorrect regions. [file Table_1.XLSX]

## Sheet: Sheet1
TABLE S1 Number of cleaned reads generated and mapped for each sample. The RNA-seq data were aligned to the RefSeqv1.0 assembly using HISAT with strict mapping options to reduce the noise caused by reads mapping to the incorrect regions.
Sample name	Sample library	Total reads	Total trimmed paired-end reads	HISAT overall alignment rate (%)	Mean percentage mapped per sample (%)
Wheat containing Ph1, replicate 1	CS+_2_LIB19444_LDI16787	59881097	36837206	89.15	87.9833
Wheat containing Ph1, replicate 2	CS+_3_LIB19445_LDI16788	60591318	23455156	87.36
Wheat containing Ph1, replicate 3	CS+_4_LIB19446_LDI16789	52261400	18769066	87.44
Wheat lacking Ph1, replicate 1	CS-_2_LIB19447_LDI16790	58817147	19072300	86.93	88.9433
Wheat lacking Ph1, replicate 2	CS-_3_LIB19448_LDI16791	51037368	21751146	89.68
Wheat lacking Ph1, replicate 3	CS-_4_LIB19449_LDI16792	53385365	35219800	90.22
Wheat-rye hybrid containing Ph1, replicate 1	WR+_1_LIB19432_LDI16775	98765408	62267361	74.47	74.5367
Wheat-rye hybrid containing Ph1, replicate 2	WR+_2_LIB19433_LDI16776	96066843	47510551	74.48
Wheat-rye hybrid containing Ph1, replicate 3	WR+_3_LIB19434_LDI16777	68851137	43779254	74.66
Wheat-rye hybrid lacking Ph1, replicate 1	WR-_1_LIB19435_LDI16778	256876753	70000000	74.23	74.69
Wheat-rye hybrid lacking Ph1, replicate 2	WR-_2_LIB19436_LDI16779	73715519	43516877	74.82
Wheat-rye hybrid lacking Ph1, replicate 3	WR-_3_LIB19437_LDI16780	81207877	50702879	75.02
Triticale containing Ph1, replicate 1	WWRR+_1_LIB19438_LDI16781	66894684	43821761	75.59	75.4033
Triticale containing Ph1, replicate 2	WWRR+_2_LIB19439_LDI16782	50035149	32632453	75.09
Triticale containing Ph1, replicate 3	WWRR+_3_LIB19440_LDI16783	70285239	43647979	75.53
Triticale lacking Ph1, replicate 1	WWRR-_1_LIB19441_LDI16784	75775797	37591095	75.17	75.55
Triticale lacking Ph1, replicate 2	WWRR-_2_LIB19442_LDI16785	45926370	30330252	75.79
Triticale lacking Ph1, replicate 3	WWRR-_3_LIB19443_LDI16786	67468748	42023728	75.69
