# Supplementary material for: Genome-Wide Transcription During Early Wheat Meiosis Is Independent of Synapsis, Ploidy Level, and the Ph1 Locus
Source: Front Plant Sci. 2018 Dec 4;9:1791. doi: 10.3389/fpls.2018.01791 (PMC6288783; doi:10.3389/fpls.2018.01791)
Supplement: TABLE S2 — Number of reads generated and mapped for each sample using Kallisto. (A) Wheat samples were pseudoaligned against the Chinese Spring RefSeqv1.0+UTR transcriptome reference. (B) Wheat–rye hybrids and triticale samples were pseudoaligned against a wheat+rye transcriptome constructed in silico by combining the Chinese Spring RefSeqv1.0+UTR transcriptome reference with the published rye transcriptome (Bauer et al., 2016). [file Table_2.XLSX]

## Sheet: Final
TABLE S2 Number of reads generated and mapped for each sample using Kallisto. (A) Wheat samples were pseudoaligned against the Chinese Spring RefSeqv1.0+UTR transcriptome reference. (B) Wheat-rye hybrids and triticale samples were pseudoaligned against a wheat+rye transcriptome constructed in silico by combining the Chinese Spring RefSeqv1.0+UTR transcriptome reference with the published rye tran…
A Sample name	Sample library	Total reads	kallisto pseudoaligned reads	Percentage mapped to wheat (%)	Mean percentage mapped per sample (%)
Wheat containing Ph1, replicate 1	CS+_2_LIB19444_LDI16787	59881097	46633143	77.88	72.7067
Wheat containing Ph1, replicate 2	CS+_3_LIB19445_LDI16788	60591318	43254277	71.39
Wheat containing Ph1, replicate 3	CS+_4_LIB19446_LDI16789	52261400	35983910	68.85
Wheat lacking Ph1, replicate 1	CS-_2_LIB19447_LDI16790	58817147	39607029	67.34	72.58
Wheat lacking Ph1, replicate 2	CS-_3_LIB19448_LDI16791	51037368	36939141	72.38
Wheat lacking Ph1, replicate 3	CS-_4_LIB19449_LDI16792	53385365	41653041	78.02
B Sample name	Sample library	Total reads	kallisto pseudoaligned reads	Percentage mapped to wheat+rye (%)	Mean percentage mapped per sample (%)
Wheat-rye hybrid containing Ph1, replicate 1	WR+_1_LIB19432_LDI16775	98765408	70773481	71.66	71.14
Wheat-rye hybrid containing Ph1, replicate 2	WR+_2_LIB19433_LDI16776	96066843	66891099	69.63
Wheat-rye hybrid containing Ph1, replicate 3	WR+_3_LIB19434_LDI16777	68851137	49659082	72.13
Wheat-rye hybrid lacking Ph1, replicate 1	WR-_1_LIB19435_LDI16778	256876753	183753111	71.53	71.5
Wheat-rye hybrid lacking Ph1, replicate 2	WR-_2_LIB19436_LDI16779	73715519	52324183	70.98
Wheat-rye hybrid lacking Ph1, replicate 3	WR-_3_LIB19437_LDI16780	81207877	58461367	71.99
Triticale containing Ph1, replicate 1	WWRR+_1_LIB19438_LDI16781	66894684	46915402	70.13	70.75
Triticale containing Ph1, replicate 2	WWRR+_2_LIB19439_LDI16782	50035149	35386494	70.72
Triticale containing Ph1, replicate 3	WWRR+_3_LIB19440_LDI16783	70285239	50185098	71.4
Triticale lacking Ph1, replicate 1	WWRR-_1_LIB19441_LDI16784	75775797	52755230	69.62	71.3667
Triticale lacking Ph1, replicate 2	WWRR-_2_LIB19442_LDI16785	45926370	33569057	73.09
Triticale lacking Ph1, replicate 3	WWRR-_3_LIB19443_LDI16786	67468748	48164296	71.39

## Sheet: Figure S2
Figure S2 Number of reads generated and mapped for each sample using Kallisto. (A) Wheat samples were pseudoaligned against the Chinese Spring RefSeqv1.0+UTR transcriptome reference. (B) Wheat-rye hybrids and triticale samples were pseudoaligned against a wheat+rye transcriptome constructed in silico by combining the Chinese Spring RefSeqv1.0+UTR transcriptome reference with the published rye tra…
(A) Sample name	Sample library	Total reads	kallisto pseudoaligned reads	Percentage mapped to wheat (%)	Mean percentage mapped per sample (%)
Wheat containing Ph1, replicate 1	WW+_2_LIB19444_LDI16787	59881097	46633143	77.88	72.7067
Wheat containing Ph1, replicate 2	WW+_3_LIB19445_LDI16788	60591318	43254277	71.39
Wheat containing Ph1, replicate 3	WW+_4_LIB19446_LDI16789	52261400	35983910	68.85
Wheat lacking Ph1, replicate 1	WW-_2_LIB19447_LDI16790	58817147	39607029	67.34	72.58
Wheat lacking Ph1, replicate 2	WW-_3_LIB19448_LDI16791	51037368	36939141	72.38
Wheat lacking Ph1, replicate 3	WW-_4_LIB19449_LDI16792	53385365	41653041	78.02
(B) Sample name	Sample library	Total reads	kallisto pseudoaligned reads	Percentage mapped to wheat+rye (%)	Mean percentage mapped per sample (%)
Wheat containing Ph1, replicate 1	WW+_2_LIB19444_LDI16787	59881097	46578950	77.79	72.64
Wheat containing Ph1, replicate 2	WW+_3_LIB19445_LDI16788	60591318	43219909	71.33
Wheat containing Ph1, replicate 3	WW+_4_LIB19446_LDI16789	52261400	35955202	68.8
Wheat lacking Ph1, replicate 1	WW-_2_LIB19447_LDI16790	58817147	39580191	67.29	72.51
Wheat lacking Ph1, replicate 2	WW-_3_LIB19448_LDI16791	51037368	36905467	72.31
Wheat lacking Ph1, replicate 3	WW-_4_LIB19449_LDI16792	53385365	41602154	77.93
Wheat-rye hybrid containing Ph1, replicate 1	WR+_1_LIB19432_LDI16775	98765408	70773481	71.66	71.14
Wheat-rye hybrid containing Ph1, replicate 2	WR+_2_LIB19433_LDI16776	96066843	66891099	69.63
Wheat-rye hybrid containing Ph1, replicate 3	WR+_3_LIB19434_LDI16777	68851137	49659082	72.13
Wheat-rye hybrid lacking Ph1, replicate 1	WR-_1_LIB19435_LDI16778	256876753	183753111	71.53	71.5
Wheat-rye hybrid lacking Ph1, replicate 2	WR-_2_LIB19436_LDI16779	73715519	52324183	70.98
Wheat-rye hybrid lacking Ph1, replicate 3	WR-_3_LIB19437_LDI16780	81207877	58461367	71.99
Triticale containing Ph1, replicate 1	WWRR+_1_LIB19438_LDI16781	66894684	46915402	70.13	70.75
Triticale containing Ph1, replicate 2	WWRR+_2_LIB19439_LDI16782	50035149	35386494	70.72
Triticale containing Ph1, replicate 3	WWRR+_3_LIB19440_LDI16783	70285239	50185098	71.4
Triticale lacking Ph1, replicate 1	WWRR-_1_LIB19441_LDI16784	75775797	52755230	69.62	71.3667
Triticale lacking Ph1, replicate 2	WWRR-_2_LIB19442_LDI16785	45926370	33569057	73.09
Triticale lacking Ph1, replicate 3	WWRR-_3_LIB19443_LDI16786	67468748	48164296	71.39
