# Supplementary material for: Genome-Wide Transcription During Early Wheat Meiosis Is Independent of Synapsis, Ploidy Level, and the Ph1 Locus
Source: Front Plant Sci. 2018 Dec 4;9:1791. doi: 10.3389/fpls.2018.01791 (PMC6288783; doi:10.3389/fpls.2018.01791)
Supplement: TABLE S3 — Number of DEG among samples using different thresholds in the presence (Ph1+) and absence (Ph1-) of the Ph1 locus. (A) Number of wheat DEGs. (B) Number of rye DEGs. The first number in every column title represents the p-adj filter (>0.05, >0.01 or >0.001). The 2FC indicates that genes were up or down-regulated over twofolds. [file Table_3.XLSX]

## Sheet: Sheet1
TABLE S3 Number of DEG among samples using different thresholds in the presence (Ph1+) and absence (Ph1-) of the Ph1 locus. (A) Number of wheat DEG. (B) Number of rye DEG. The first number in every column tittle represents the p-adj filter (˃ 0.05, ˃ 0.01 or ˃ 0.001). The 2FC indicates that genes were up or downregulated over 2-folds.
A	Wheat HC + LC genes
	Comparison	upreg_0.05	downreg_0.05	upreg_0.05_2FC	downreg_0.05_2FC	upreg_0.01	downreg_0.01	upreg_0.01_2FC	downreg_0.01_2FC	upreg_0.001	downreg_0.001	upreg_0.001_2FC	downreg_0.001_2FC
	Wheat Ph1+ vs. wheat Ph1-	514	43	514	41	450	24	450	24	405	18	405	18
	Wheat-rye Ph1+ vs. wheat-rye Ph1-	668	308	559	192	547	146	508	104	483	90	467	68
	Triticale Ph1+ vs. triticale Ph1-	2326	2643	2057	1399	1912	1654	1820	962	1654	1078	1621	655
	Wheat-rye Ph1+ vs. triticale Ph1+	837	829	365	532	302	284	205	226	128	114	109	105
	Wheat-rye Ph1- vs. triticale Ph1-	3007	5036	2058	2824	1846	2931	1601	1872	1353	1668	1290	1131
	Wheat HC genes
	Comparison	upreg_0.05	downreg_0.05	upreg_0.05_2FC	downreg_0.05_2FC	upreg_0.01	downreg_0.01	upreg_0.01_2FC	downreg_0.01_2FC	upreg_0.001	downreg_0.001	upreg_0.001_2FC	downreg_0.001_2FC
	Wheat Ph1+ vs. wheat Ph1-	435	33	435	31	384	18	384	18	352	12	352	12
	Wheat-rye Ph1+ vs. wheat-rye Ph1-	497	131	406	70	411	78	380	47	375	56	364	35
	Triticale Ph1+ vs. triticale Ph1-	1743	2205	1547	1103	1535	1414	1468	776	1389	935	1362	535
	Wheat-rye Ph1+ vs. triticale Ph1+	492	397	142	247	147	147	76	117	47	59	32	55
	Wheat-rye Ph1- vs. triticale Ph1-	2038	4075	1378	2174	1382	2441	1194	1494	1112	1425	1061	927
	Wheat LC genes
	Comparison	upreg_0.05	downreg_0.05	upreg_0.05_2FC	downreg_0.05_2FC	upreg_0.01	downreg_0.01	upreg_0.01_2FC	downreg_0.01_2FC	upreg_0.001	downreg_0.001	upreg_0.001_2FC	downreg_0.001_2FC
	Wheat Ph1+ vs. wheat Ph1-	79	10	79	10	66	6	66	6	53	6	53	6
	Wheat-rye Ph1+ vs. wheat-rye Ph1-	120	155	117	107	100	58	98	48	84	28	82	27
	Triticale Ph1+ vs. triticale Ph1-	484	284	449	191	328	156	311	117	238	92	234	72
	Wheat-rye Ph1+ vs. triticale Ph1+	174	355	146	229	78	97	74	77	39	34	38	33
	Wheat-rye Ph1- vs. triticale Ph1-	643	543	550	359	348	282	328	215	188	145	186	120
B	Rye genes
	Comparison	upreg_0.05	downreg_0.05	upreg_0.05_2FC	downreg_0.05_2FC	upreg_0.01	downreg_0.01	upreg_0.01_2FC	downreg_0.01_2FC	upreg_0.001	downreg_0.001	upreg_0.001_2FC	downreg_0.001_2FC
	Wheat-rye Ph1+ vs. wheat-rye Ph1-	51	22	36	15	36	10	30	9	24	6	21	6
	Triticale Ph1+ vs. triticale Ph1-	99	154	61	105	49	84	41	69	27	51	25	48
	Wheat-rye Ph1+ vs. triticale Ph1+	171	77	77	56	77	40	55	32	42	21	39	17
	Wheat-rye Ph1- vs. triticale Ph1-	326	418	130	291	116	208	79	163	53	98	43	84
