# Supplementary material for: Genome-Wide Transcription During Early Wheat Meiosis Is Independent of Synapsis, Ploidy Level, and the Ph1 Locus
Source: Front Plant Sci. 2018 Dec 4;9:1791. doi: 10.3389/fpls.2018.01791 (PMC6288783; doi:10.3389/fpls.2018.01791)
Supplement: TABLE S4 — Genes differentially expressed among samples and total number of expressed genes (EG) in this study. (A) High confidence (HC) wheat genes. (B) Low confidence (LC) wheat genes. (C) Rye genes. [file Table_4.XLSX]

## Sheet: Sheet1
TABLE S4 Genes differentially expressed among samples and total number of expressed genes (EG) in this study. (A) High confidenece (HC) wheat genes. (B) Low confidence (LC) wheat genes. (C) Rye genes.
A	HC wheat genes
	Comparison	Upregulated 0.01_2FC	Downregulated 0.01_2FC	Total DEG	% DEG	Total EG (wheat)
	Wheat Ph1+ vs. wheat Ph1-	384	18	402	0.847493	47434
	Wheat-rye Ph1+ vs. wheat-rye Ph1-	380	47	427	0.849042	50292
	Triticale Ph1+ vs. triticale Ph1-	1468	776	2244	4.46194
	Wheat-rye Ph1+ vs. triticale Ph1+	76	117	193	0.383759
	All Ph1+ vs. all Ph1-	307	4	311	0.669076	46482
B	LC wheat genes
	Comparison	Upregulated 0.01_2FC	Downregulated 0.01_2FC	Total DEG	% DEG	Total EG (wheat)
	Wheat Ph1+ vs. wheat Ph1-	66	6	72	0.15179	18149
	Wheat-rye Ph1+ vs. wheat-rye Ph1-	98	48	146	0.290305	22138
	Triticale Ph1+ vs. triticale Ph1-	311	117	428	0.85103
	Wheat-rye Ph1+ vs. triticale Ph1+	74	77	151	0.300247
	All Ph1+ vs. all Ph1-	46	1	47	0.101114	17047
C	Rye genes
	Comparison	Upregulated 0.01_2FC	Downregulated 0.01_2FC	Total DEG	% DEG	Total EG (Rye)
	Wheat-rye Ph1+ vs. wheat-rye Ph1-	30	9	39	0.36205	10772
	Triticale Ph1+ vs. triticale Ph1-	41	69	110	1.02117
	Wheat-rye Ph1+ vs. triticale Ph1+	55	32	87	0.807649
