# Supplementary material for: Genome-Wide Transcription During Early Wheat Meiosis Is Independent of Synapsis, Ploidy Level, and the Ph1 Locus
Source: Front Plant Sci. 2018 Dec 4;9:1791. doi: 10.3389/fpls.2018.01791 (PMC6288783; doi:10.3389/fpls.2018.01791)
Supplement: TABLE S5 — (A) Gene ontology (GO) classification of DEGs up-regulated in wheat–rye hybrids vs. triticale (both containing the Ph1 locus). (B) Gene ontology (GO) classification of DEGs down-regulated in wheat–rye hybrids vs. triticale (both containing the Ph1 locus). (C) GO Slim classification of DEGs down-regulated in wheat–rye hybrids vs. triticale (both containing the Ph1 locus). This list was created to have a broad overview of the ontology content without the detail of the specific fine-grained terms. [file Table_5.XLSX]

## Sheet: all_genes_upreg_padj0.01_2FoldC
TABLE S5A. Gene ontology (GO) classification of DEGs up-regulated in wheat-rye hybrids vs. Triticale (both containing the Ph1 locus).
category	over_represented_pvalue	numDEInCat	numInCat	term	ontology	over_rep_padj
GO:0060776	2.42642e-07	3	14	simple leaf morphogenesis	BP	0.00174751
GO:0004350	7.24537e-06	2	6	glutamate-5-semialdehyde dehydrogenase activity	MF	0.0173937
GO:0017084	7.24537e-06	2	6	delta1-pyrroline-5-carboxylate synthetase activity	MF	0.0173937
GO:0019295	2.03393e-05	2	8	coenzyme M biosynthetic process	BP	0.0327728
GO:0010012	2.81829e-05	2	10	steroid 22-alpha hydroxylase activity	MF	0.0327728
GO:0010295	2.81829e-05	2	10	(+)-abscisic acid 8'-hydroxylase activity	MF	0.0327728
GO:0055129	3.38274e-05	2	9	L-proline biosynthetic process	BP	0.0327728
GO:0051777	4.15769e-05	2	12	ent-kaurenoate oxidase activity	MF	0.0327728
GO:0015706	4.49462e-05	5	398	nitrate transport	BP	0.0327728
GO:0016630	4.55051e-05	2	10	protochlorophyllide reductase activity	MF	0.0327728
GO:0009682	5.54898e-05	3	79	induced systemic resistance	BP	0.0363307
GO:0048838	7.22238e-05	2	14	release of seed from dormancy	BP	0.040843
GO:0010167	7.37238e-05	5	435	response to nitrate	BP	0.040843

## Sheet: all_genes_downreg_padj0.01_2Fol
TABLE S5B. Gene ontology (GO) classification of DEGs down-regulated in wheat-rye hybrids vs. Triticale (both containing the Ph1 locus).
category	over_represented_pvalue	numDEInCat	numInCat	term	ontology	over_rep_padj
GO:0044347	0	7	11	cell wall polysaccharide catabolic process	BP	0
GO:0080001	0	7	32	mucilage extrusion from seed coat	BP	0
GO:0080040	2.62303e-11	5	10	positive regulation of cellular response to phosphate starvation	BP	6.29702e-08
GO:0016036	1.29359e-10	12	433	cellular response to phosphate starvation	BP	2.32911e-07
GO:0009505	2.33517e-09	17	1326	plant-type cell wall	CC	3.36358e-06
GO:0051707	3.72672e-09	10	336	response to other organism	BP	4.4733e-06
GO:0005506	5.50686e-09	14	821	iron ion binding	MF	5.66577e-06
GO:0009809	9.64988e-09	9	264	lignin biosynthetic process	BP	8.6873e-06
GO:0043900	2.95344e-08	8	212	regulation of multi-organism process	BP	2.2078e-05
GO:0006817	3.06554e-08	5	43	phosphate ion transport	BP	2.2078e-05
GO:0009624	9.87519e-08	10	528	response to nematode	BP	6.43523e-05
GO:0002229	1.07224e-07	6	112	defense response to oomycetes	BP	6.43523e-05
GO:0005618	2.03299e-07	16	1491	cell wall	CC	0.000112628
GO:0020037	4.20811e-07	10	518	heme binding	MF	0.000192975
GO:0009595	4.53845e-07	8	304	detection of biotic stimulus	BP	0.000192975
GO:0052731	4.55508e-07	3	7	phosphocholine phosphatase activity	MF	0.000192975
GO:0052732	4.55508e-07	3	7	phosphoethanolamine phosphatase activity	MF	0.000192975
GO:0046865	7.32265e-07	3	17	terpenoid transport	BP	0.000292987
GO:0009697	7.91183e-07	9	456	salicylic acid biosynthetic process	BP	0.0002999
GO:0015850	8.77759e-07	3	18	organic hydroxy compound transport	BP	0.00030103
GO:1901140	8.77759e-07	3	18	p-coumaryl alcohol transport	BP	0.00030103
GO:0035435	9.71765e-07	4	35	phosphate ion transmembrane transport	BP	0.00031812
GO:0071366	1.12245e-06	3	19	cellular response to indolebutyric acid stimulus	BP	0.000351474
GO:0080168	3.56204e-06	3	23	abscisic acid transport	BP	0.00106891
GO:0010310	4.15192e-06	8	410	regulation of hydrogen peroxide metabolic process	BP	0.00119608
GO:0042744	5.47986e-06	7	302	hydrogen peroxide catabolic process	BP	0.00151792
GO:0050832	6.52018e-06	15	1871	defense response to fungus	BP	0.0017392
GO:0015692	6.80061e-06	3	26	lead ion transport	BP	0.00174921
GO:0009751	7.7053e-06	10	799	response to salicylic acid	BP	0.00191357
GO:0006979	8.99466e-06	13	1377	response to oxidative stress	BP	0.00215932
GO:1901141	9.6766e-06	3	27	regulation of lignin biosynthetic process	BP	0.00224809
GO:0004601	1.29415e-05	8	450	peroxidase activity	MF	0.00291264
GO:0015086	1.41025e-05	3	32	cadmium ion transmembrane transporter activity	MF	0.00307776
GO:0043086	1.64725e-05	5	141	negative regulation of catalytic activity	BP	0.0034167
GO:0042344	1.66044e-05	3	33	indole glucosinolate catabolic process	BP	0.0034167
GO:0005576	1.79173e-05	18	2676	extracellular region	CC	0.00358445
GO:0033759	1.88988e-05	2	3	flavone synthase activity	MF	0.00367863
GO:0000165	2.29723e-05	8	534	MAPK cascade	BP	0.00435386
GO:0009055	2.93011e-05	11	1048	electron transfer activity	MF	0.00541094
GO:0051262	3.60019e-05	3	37	protein tetramerization	BP	0.00648215
GO:0009862	4.49257e-05	9	749	systemic acquired resistance, salicylic acid mediated signaling pathway	BP	0.00789157
GO:0015114	8.00124e-05	3	40	phosphate ion transmembrane transporter activity	MF	0.0135788
GO:0006855	8.20491e-05	4	129	drug transmembrane transport	BP	0.0135788
GO:0016491	8.29587e-05	16	2361	oxidoreductase activity	MF	0.0135788
GO:0046658	0.000103109	6	310	anchored component of plasma membrane	CC	0.0165021
GO:0046475	0.00012658	2	7	glycerophospholipid catabolic process	BP	0.019818
GO:0016462	0.000135884	3	40	pyrophosphatase activity	MF	0.0208221
GO:0002239	0.000149268	2	12	response to oomycetes	BP	0.0223964
GO:0055062	0.000156032	3	53	phosphate ion homeostasis	BP	0.022705
GO:0015315	0.00015763	2	9	organophosphate:inorganic phosphate antiporter activity	MF	0.022705
GO:0005509	0.000175048	9	929	calcium ion binding	MF	0.0247196
GO:0009867	0.000186204	8	737	jasmonic acid mediated signaling pathway	BP	0.0257893
GO:0006952	0.000190375	14	2239	defense response	BP	0.0258695
GO:0042626	0.000194124	4	188	ATPase activity, coupled to transmembrane movement of substances	MF	0.0258904
GO:0010363	0.000206099	10	1130	regulation of plant-type hypersensitive response	BP	0.0269877
GO:0004427	0.000291218	3	60	inorganic diphosphatase activity	MF	0.0374527
GO:0042742	0.000311924	13	2039	defense response to bacterium	BP	0.0394119
GO:0046345	0.000363175	3	60	abscisic acid catabolic process	BP	0.0450963

## Sheet: GO_SLIM_all_genes_downreg_padj0
TABLE S5C. GO Slim classification of DEGs down-regulated in wheat-rye hybrids vs. Triticale (both containing the Ph1 locus). To have a broad overview of the ontology content without the detail of the specific fine-grained terms.
category	over_represented_pvalue	numDEInCat	numInCat	term	ontology	over_rep_padj
GO:0005618	4.64848e-09	17	1374	cell wall	CC	4.32309e-07
GO:0009605	1.24572e-08	43	8574	response to external stimulus	BP	5.79258e-07
GO:0030312	1.29903e-07	20	2333	external encapsulating structure	CC	4.02699e-06
GO:0019748	1.0758e-06	17	1928	secondary metabolic process	BP	2.50123e-05
GO:0009991	2.66478e-06	14	1376	response to extracellular stimulus	BP	4.95649e-05
GO:0006950	1.19894e-05	59	16755	response to stress	BP	0.000185835
GO:0009607	0.000129817	28	6410	response to biotic stimulus	BP	0.00172472
GO:0007154	0.00133449	29	7840	cell communication	BP	0.0155135
GO:0009056	0.00377901	26	6884	catabolic process	BP	0.0390498
GO:0005886	0.00473779	8	1265	plasma membrane	CC	0.0440614
