# Supplementary material for: Genome-Wide Transcription During Early Wheat Meiosis Is Independent of Synapsis, Ploidy Level, and the Ph1 Locus
Source: Front Plant Sci. 2018 Dec 4;9:1791. doi: 10.3389/fpls.2018.01791 (PMC6288783; doi:10.3389/fpls.2018.01791)
Supplement: TABLE S6 — (A) Functional annotation of DEGs up-regulated in wheat–rye hybrids vs. triticale (both containing Ph1). (B) Functional annotation of DEGs down-regulated in wheat–rye hybrids vs. triticale (both containing Ph1). [file Table_6.XLSX]

## Sheet: UP_DEG_function_annotation
TABLE S6A Functional annotation of DEGs up-regulated in wheat-rye hybrids vs. Triticale (both containing Ph1)
	gene	Gene.ID	is_repr	AHRD.Quality.Code	Blast.Hit.Accession	Human.Readable.Description	Pfam.IDs..Description.	Interpro.IDs..Description.	GO.IDs..Description..via.Interpro	Gene.or.TE.TE..U..via.function.	Pfam.IDs	Interpro.IDs	GO.IDs.via.Interpro
1	TraesCS1A01G000100	TraesCS1A01G000100.1	1	-**	sp|P0AGJ7|TRML_ECOLI	tRNA (cytidine(34)-2'-O)-methyltransferase				G
2	TraesCS1A01G000300	TraesCS1A01G000300.1	1	--*	tr|A0A0B0PNK9|A0A0B0PNK9_GOSAR	Coiled-coil domain-containing protein				G
3	TraesCS1A01G000600	TraesCS1A01G000600.1	1	--*	sp|B0T336|ATPG_CAUSK	ATP synthase gamma chain				G
4	TraesCS1A01G000700LC	TraesCS1A01G000700LC.1	1	*-*	tr|A0A072TJH8|A0A072TJH8_MEDTR	Senescence-associated protein, putative				G
5	TraesCS1A01G000800	TraesCS1A01G000800.1	1	*-*	sp|Q6CQE5|TAR1_KLULA	Protein TAR1				G
6	TraesCS1A01G001000	TraesCS1A01G001000.1	1	--*	sp|Q0CBX9|SRB8_ASPTN	Mediator of RNA polymerase II transcription subunit 12				G
7	TraesCS1A01G001500LC	TraesCS1A01G001500LC.1	1	*-*	tr|A0A072TJH8|A0A072TJH8_MEDTR	Senescence-associated protein, putative				G
8	TraesCS1A01G001700	TraesCS1A01G001700.1	1	-**	sp|A7NR50|RS14Z_ROSCS	30S ribosomal protein S14 type Z				G
9	TraesCS1A01G183100	TraesCS1A01G183100.2	1	***	tr|B6U5D8|B6U5D8_MAIZE	Actin-depolymerizing factor	PF00241: Cofilin/tropomyosin-type actin-binding protein	IPR002108: Actin-depolymerising factor homology domain; IPR029006: ADF-H/Gelsolin-like domain	GO:0003779 MF: actin binding;GO:0005622 CC: intracellular	G	PF00241	IPR002108; IPR029006	GO:0003779; GO:0005622
10	TraesCS1A01G183100	TraesCS1A01G183100.1	0	***	tr|B6U5D8|B6U5D8_MAIZE	Actin-depolymerizing factor	PF00241: Cofilin/tropomyosin-type actin-binding protein	IPR002108: Actin-depolymerising factor homology domain; IPR029006: ADF-H/Gelsolin-like domain	GO:0003779 MF: actin binding;GO:0005622 CC: intracellular	G	PF00241	IPR002108; IPR029006	GO:0003779; GO:0005622
11	TraesCS1A01G253200	TraesCS1A01G253200.1	1	***	tr|A0A1D5RX09|A0A1D5RX09_WHEAT	Pyruvate, phosphate dikinase	PF01326: Pyruvate phosphate dikinase, PEP/pyruvate binding domain; PF00391: PEP-utilising enzyme, mobile domain; PF02896: PEP-utilising enzyme, TIM barrel domain	IPR000121: PEP-utilising enzyme, C-terminal; IPR002192: Pyruvate phosphate dikinase, PEP/pyruvate-binding; IPR008279: PEP-utilising enzyme, mobile domain; IPR010121: Pyruvate, phosphate dikinase; IPR013815: ATP-grasp fold, subdomain 1; IPR015813: Pyruvate/Phosphoenolpyruvate kinase-like domain; IPR018274: PEP-utilising enzyme, active site; IPR023151: PEP-utilising enzyme, conserved site	GO:0003824 MF: catalytic activity;GO:0005524 MF: ATP binding;GO:0006090 BP: pyruvate metabolic process;GO:0016301 MF: kinase activity;GO:0016310 BP: phosphorylation;GO:0016772 MF: transferase activity, transferring phosphorus-containing groups;GO:0050242 MF: pyruvate, phosphate dikinase activity	G	PF01326; PF00391; PF02896	IPR000121; IPR002192; IPR008279; IPR010121; IPR013815; IPR015813; IPR018274; IPR023151	GO:0003824; GO:0005524; GO:0006090; GO:0016301; GO:0016310; GO:0016772; GO:0050242
12	TraesCS1A01G253200	TraesCS1A01G253200.2	0	***	tr|A0A1D5RX09|A0A1D5RX09_WHEAT	Pyruvate, phosphate dikinase	PF01326: Pyruvate phosphate dikinase, PEP/pyruvate binding domain; PF00391: PEP-utilising enzyme, mobile domain; PF02896: PEP-utilising enzyme, TIM barrel domain	IPR000121: PEP-utilising enzyme, C-terminal; IPR002192: Pyruvate phosphate dikinase, PEP/pyruvate-binding; IPR008279: PEP-utilising enzyme, mobile domain; IPR010121: Pyruvate, phosphate dikinase; IPR013815: ATP-grasp fold, subdomain 1; IPR015813: Pyruvate/Phosphoenolpyruvate kinase-like domain; IPR018274: PEP-utilising enzyme, active site; IPR023151: PEP-utilising enzyme, conserved site	GO:0003824 MF: catalytic activity;GO:0005524 MF: ATP binding;GO:0006090 BP: pyruvate metabolic process;GO:0016301 MF: kinase activity;GO:0016310 BP: phosphorylation;GO:0016772 MF: transferase activity, transferring phosphorus-containing groups;GO:0050242 MF: pyruvate, phosphate dikinase activity	G	PF01326; PF00391; PF02896	IPR000121; IPR002192; IPR008279; IPR010121; IPR013815; IPR015813; IPR018274; IPR023151	GO:0003824; GO:0005524; GO:0006090; GO:0016301; GO:0016310; GO:0016772; GO:0050242
13	TraesCS1A01G404600	TraesCS1A01G404600.1	1	***	tr|M7YUH8|M7YUH8_TRIUA	Subtilisin-like protease	PF05922: Peptidase inhibitor I9; PF00082: Subtilase family	IPR000209: Peptidase S8/S53 domain; IPR010259: Peptidase S8 propeptide/proteinase inhibitor I9; IPR015500: Peptidase S8, subtilisin-related; IPR022398: Peptidase S8, subtilisin, His-active site; IPR023828: Peptidase S8, subtilisin, Ser-active site	GO:0004252 MF: serine-type endopeptidase activity;GO:0006508 BP: proteolysis	G	PF05922; PF00082	IPR000209; IPR010259; IPR015500; IPR022398; IPR023828	GO:0004252; GO:0006508
14	TraesCS1A01G541000LC	TraesCS1A01G541000LC.1	1	*-*	tr|I6N9E2|I6N9E2_GINBI	Photosystem II CP43 reaction center protein	PF00421: Photosystem II protein	IPR000932: Photosystem antenna protein-like	GO:0009521 CC: photosystem;GO:0009767 BP: photosynthetic electron transport chain;GO:0016020 CC: membrane;GO:0016168 MF: chlorophyll binding;GO:0019684 BP: photosynthesis, light reaction	G	PF00421	IPR000932	GO:0009521; GO:0009767; GO:0016020; GO:0016168; GO:0019684
15	TraesCS1B01G101400	TraesCS1B01G101400.1	1	--*	tr|A0A0S3R6N8|A0A0S3R6N8_PHAAN	Ubiquitinyl hydrolase 1				G
16	TraesCS1B01G136500LC	TraesCS1B01G136500LC.1	1	--*	AT1G67520.2	lectin protein kinase family protein				G
17	TraesCS1B01G136700LC	TraesCS1B01G136700LC.1	1	*-*	tr|A0A072TJH8|A0A072TJH8_MEDTR	Senescence-associated protein, putative				G
18	TraesCS1B01G197600	TraesCS1B01G197600.1	1	***	tr|B6U5D8|B6U5D8_MAIZE	Actin-depolymerizing factor	PF00241: Cofilin/tropomyosin-type actin-binding protein	IPR002108: Actin-depolymerising factor homology domain; IPR029006: ADF-H/Gelsolin-like domain	GO:0003779 MF: actin binding;GO:0005622 CC: intracellular	G	PF00241	IPR002108; IPR029006	GO:0003779; GO:0005622
19	TraesCS1B01G255400	TraesCS1B01G255400.1	1	*-*	tr|G7K296|G7K296_MEDTR	Fantastic four-like protein	PF11250: Fantastic Four meristem regulator	IPR021410: The fantastic four family		G	PF11250	IPR021410
20	TraesCS1B01G457200	TraesCS1B01G457200.1	1	--*	AT2G21510.5	DNAJ heat shock N-terminal domain-containing protein				G
21	TraesCS1B01G471300	TraesCS1B01G471300.1	1	***	tr|A0A1D5SDT2|A0A1D5SDT2_WHEAT	Cytokinin riboside 5'-monophosphate phosphoribohydrolase	PF03641: Possible lysine decarboxylase	IPR005269: Cytokinin riboside 5'-monophosphate phosphoribohydrolase LOG; IPR031100: LOG family		G	PF03641	IPR005269; IPR031100
22	TraesCS1B01G476000	TraesCS1B01G476000.1	1	*-*	AT5G25520.2	SPOC domain / Transcription elongation factor S-II protein	PF07744: SPOC domain	IPR012921: Spen paralogue and orthologue SPOC, C-terminal		G	PF07744	IPR012921
23	TraesCS1B01G514300LC	TraesCS1B01G514300LC.1	1	***	tr|A0A061F958|A0A061F958_THECC	Ankyrin repeat family protein	PF12796: Ankyrin repeats (3 copies); PF07719: Tetratricopeptide repeat	IPR002110: Ankyrin repeat; IPR011990: Tetratricopeptide-like helical domain; IPR013026: Tetratricopeptide repeat-containing domain; IPR013105: Tetratricopeptide repeat 2; IPR019734: Tetratricopeptide repeat; IPR020683: Ankyrin repeat-containing domain	GO:0005515 MF: protein binding	G	PF12796; PF07719	IPR002110; IPR011990; IPR013026; IPR013105; IPR019734; IPR020683	GO:0005515
24	TraesCS1B01G551100LC	TraesCS1B01G551100LC.1	1	--*	AT1G06720.3	P-loop containing nucleoside triphosphate hydrolases superfamily protein				G
25	TraesCS1B01G551500LC	TraesCS1B01G551500LC.1	1	--*	AT1G67520.3	lectin protein kinase family protein				G
26	TraesCS1B01G552200LC	TraesCS1B01G552200LC.1	1	*-*	tr|A0A072TJH8|A0A072TJH8_MEDTR	Senescence-associated protein, putative				G
27	TraesCS1B01G552500LC	TraesCS1B01G552500LC.1	1	*-*	tr|A0A072TJH8|A0A072TJH8_MEDTR	Senescence-associated protein, putative				G
28	TraesCS1B01G761500LC	TraesCS1B01G761500LC.1	1	*-*	sp|Q9HJM1|SYD_THEAC	Aspartate--tRNA(Asp) ligase	PF00152: tRNA synthetases class II (D, K and N)	IPR004364: Aminoacyl-tRNA synthetase, class II (D/K/N)	GO:0000166 MF: nucleotide binding;GO:0004812 MF: aminoacyl-tRNA ligase activity;GO:0005524 MF: ATP binding;GO:0006418 BP: tRNA aminoacylation for protein translation	G	PF00152	IPR004364	GO:0000166; GO:0004812; GO:0005524; GO:0006418
29	TraesCS1D01G050000LC	TraesCS1D01G050000LC.1	1	*-*	AT4G09660.1	zinc finger MYM-type-like protein	PF14291: Domain of unknown function (DUF4371)	IPR025398: Domain of unknown function DUF4371		TE?	PF14291	IPR025398
30	TraesCS1D01G089900LC	TraesCS1D01G089900LC.1	1	--*	sp|P31634|GAG_SIVMS	Gag polyprotein				TE
31	TraesCS1D01G097000	TraesCS1D01G097000.1	1	*-*	tr|A0A072VMC3|A0A072VMC3_MEDTR	Transmembrane protein, putative				G
32	TraesCS1D01G287000LC	TraesCS1D01G287000LC.1	1	--*	sp|Q0BE45|GUAA_BURCM	GMP synthase [glutamine-hydrolyzing]				G
33	TraesCS1D01G296500	TraesCS1D01G296500.1	1	***	tr|A0A072UGX9|A0A072UGX9_MEDTR	Phosphatidylethanolamine-binding protein	PF01161: Phosphatidylethanolamine-binding protein	IPR005247: YbhB/YbcL; IPR008914: Phosphatidylethanolamine-binding protein		G	PF01161	IPR005247; IPR008914
34	TraesCS1D01G412300	TraesCS1D01G412300.1	1	***	tr|M7YUH8|M7YUH8_TRIUA	Subtilisin-like protease	PF05922: Peptidase inhibitor I9; PF00082: Subtilase family	IPR000209: Peptidase S8/S53 domain; IPR010259: Peptidase S8 propeptide/proteinase inhibitor I9; IPR015500: Peptidase S8, subtilisin-related; IPR022398: Peptidase S8, subtilisin, His-active site; IPR023828: Peptidase S8, subtilisin, Ser-active site	GO:0004252 MF: serine-type endopeptidase activity;GO:0006508 BP: proteolysis	G	PF05922; PF00082	IPR000209; IPR010259; IPR015500; IPR022398; IPR023828	GO:0004252; GO:0006508
35	TraesCS1D01G420500LC	TraesCS1D01G420500LC.1	1	*-*	tr|A0A061RWC9|A0A061RWC9_9CHLO	ATP-dependent Clp protease ATP-binding subunit ClpB	PF07724: AAA domain (Cdc48 subfamily); PF10431: C-terminal, D2-small domain, of ClpB protein	IPR003959: ATPase, AAA-type, core; IPR019489: Clp ATPase, C-terminal; IPR027417: P-loop containing nucleoside triphosphate hydrolase	GO:0005524 MF: ATP binding	G	PF07724; PF10431	IPR003959; IPR019489; IPR027417	GO:0005524
36	TraesCS2A01G073700	TraesCS2A01G073700.1	1	***	AT1G67390.1	F-box family protein	PF00646: F-box domain; PF08387: FBD	IPR001810: F-box domain; IPR006566: FBD domain; IPR032675: Leucine-rich repeat domain, L domain-like	GO:0005515 MF: protein binding	TE?	PF00646; PF08387	IPR001810; IPR006566; IPR032675	GO:0005515
37	TraesCS2A01G088900LC	TraesCS2A01G088900LC.1	1	--*	sp|B6JDC8|ATPF2_OLICO	ATP synthase subunit b 2				G
38	TraesCS2A01G194500	TraesCS2A01G194500.1	1	***	tr|B9SGY6|B9SGY6_RICCO	LOB domain-containing protein, putative	PF03195: Protein of unknown function DUF260	IPR004883: Lateral organ boundaries, LOB		G	PF03195	IPR004883
39	TraesCS2A01G354300LC	TraesCS2A01G354300LC.1	1	--*	AT4G11170.1	Disease resistance protein (TIR-NBS-LRR class) family				G
40	TraesCS2B01G037300	TraesCS2B01G037300.1	1	***	tr|Q84PD4|Q84PD4_ORYSJ	Receptor kinase-like protein	PF00069: Protein kinase domain	IPR000719: Protein kinase domain; IPR008271: Serine/threonine-protein kinase, active site; IPR011009: Protein kinase-like domain	GO:0004672 MF: protein kinase activity;GO:0005524 MF: ATP binding;GO:0006468 BP: protein phosphorylation	G	PF00069	IPR000719; IPR008271; IPR011009	GO:0004672; GO:0005524; GO:0006468
41	TraesCS2B01G047100LC	TraesCS2B01G047100LC.1	1	--*	sp|Q6FYM2|ATPG_BARQU	ATP synthase gamma chain				G
42	TraesCS2B01G052000	TraesCS2B01G052000.1	1	***	tr|G7LIE6|G7LIE6_MEDTR	Myb/SANT-like DNA-binding domain protein	PF12776: Myb/SANT-like DNA-binding domain	IPR024752: Myb/SANT-like domain		TE?	PF12776	IPR024752
43	TraesCS2B01G212400	TraesCS2B01G212400.1	1	***	tr|B9SGY6|B9SGY6_RICCO	LOB domain-containing protein, putative	PF03195: Protein of unknown function DUF260	IPR004883: Lateral organ boundaries, LOB		G	PF03195	IPR004883
44	TraesCS2B01G563800LC	TraesCS2B01G563800LC.1	0	--*	tr|B9I2R4|B9I2R4_POPTR	Actin-related family protein				G
45	TraesCS2B01G563800LC	TraesCS2B01G563800LC.2	1	--*	tr|B9I2R4|B9I2R4_POPTR	Actin-related family protein				G
46	TraesCS2B01G570800LC	TraesCS2B01G570800LC.1	1	--*	sp|Q39103|G3OX1_ARATH	Gibberellin 3-beta-dioxygenase 1				G
47	TraesCS2B01G593000	TraesCS2B01G593000.2	0	***	tr|W9RXN6|W9RXN6_9ROSA	Protochlorophyllide reductase	PF00106: short chain dehydrogenase	IPR002347: Short-chain dehydrogenase/reductase SDR; IPR005979: Light-dependent protochlorophyllide reductase; IPR016040: NAD(P)-binding domain	GO:0016630 MF: protochlorophyllide reductase activity;GO:0055114 BP: oxidation-reduction process	G	PF00106	IPR002347; IPR005979; IPR016040	GO:0016630; GO:0055114
48	TraesCS2B01G593000	TraesCS2B01G593000.1	1	***	tr|W9RXN6|W9RXN6_9ROSA	Protochlorophyllide reductase	PF00106: short chain dehydrogenase	IPR002347: Short-chain dehydrogenase/reductase SDR; IPR005979: Light-dependent protochlorophyllide reductase; IPR016040: NAD(P)-binding domain	GO:0016630 MF: protochlorophyllide reductase activity;GO:0055114 BP: oxidation-reduction process	G	PF00106	IPR002347; IPR005979; IPR016040	GO:0016630; GO:0055114
49	TraesCS2B01G804200LC	TraesCS2B01G804200LC.1	1	*-*	tr|N1R5Q9|N1R5Q9_AEGTA	BTB/POZ domain-containing protein		IPR000210: BTB/POZ domain; IPR011333: SKP1/BTB/POZ domain	GO:0005515 MF: protein binding	G		IPR000210; IPR011333	GO:0005515
50	TraesCS2B01G824700LC	TraesCS2B01G824700LC.1	1	--*	AT3G04930.1	DNA-binding storekeeper protein-related transcriptional regulator				G
51	TraesCS2D01G016000	TraesCS2D01G016000.1	1	***	tr|Q9AVM3|Q9AVM3_WHEAT	Cytochrome P450	PF00067: Cytochrome P450	IPR001128: Cytochrome P450; IPR002401: Cytochrome P450, E-class, group I; IPR017972: Cytochrome P450, conserved site	GO:0005506 MF: iron ion binding;GO:0016705 MF: oxidoreductase activity, acting on paired donors, with incorporation or reduction of molecular oxygen;GO:0020037 MF: heme binding;GO:0055114 BP: oxidation-reduction process	G	PF00067	IPR001128; IPR002401; IPR017972	GO:0005506; GO:0016705; GO:0020037; GO:0055114
52	TraesCS2D01G193400	TraesCS2D01G193400.1	1	*-*	tr|A0A0A0KJN9|A0A0A0KJN9_CUCSA	LOB domain-containing protein	PF03195: Protein of unknown function DUF260	IPR004883: Lateral organ boundaries, LOB		G	PF03195	IPR004883
53	TraesCS2D01G193400	TraesCS2D01G193400.2	0	***	tr|B9SGY6|B9SGY6_RICCO	LOB domain-containing protein, putative	PF03195: Protein of unknown function DUF260	IPR004883: Lateral organ boundaries, LOB		G	PF03195	IPR004883
54	TraesCS2D01G239900	TraesCS2D01G239900.1	1	***	tr|Q2QXK8|Q2QXK8_ORYSJ	Transposon protein, putative, Mutator sub-class	PF10551: MULE transposase domain; PF04434: SWIM zinc finger	IPR001207: Transposase, mutator type; IPR006564: Zinc finger, PMZ-type; IPR007527: Zinc finger, SWIM-type; IPR018289: MULE transposase domain	GO:0003677 MF: DNA binding;GO:0004803 MF: transposase activity;GO:0006313 BP: transposition, DNA-mediated;GO:0008270 MF: zinc ion binding	TE	PF10551; PF04434	IPR001207; IPR006564; IPR007527; IPR018289	GO:0003677; GO:0004803; GO:0006313; GO:0008270
55	TraesCS2D01G515400	TraesCS2D01G515400.2	1	--*	sp|P12111|CO6A3_HUMAN	Collagen alpha-3(VI) chain				G
56	TraesCS2D01G515400	TraesCS2D01G515400.1	0	***	tr|Q6YY09|Q6YY09_ORYSJ	Glycine-rich protein	PF07172: Glycine rich protein family	IPR010800: Glycine rich protein		G	PF07172	IPR010800
57	TraesCS2D01G563600	TraesCS2D01G563600.1	1	***	tr|W9RXN6|W9RXN6_9ROSA	Protochlorophyllide reductase	PF00106: short chain dehydrogenase	IPR002347: Short-chain dehydrogenase/reductase SDR; IPR005979: Light-dependent protochlorophyllide reductase; IPR016040: NAD(P)-binding domain	GO:0016630 MF: protochlorophyllide reductase activity;GO:0055114 BP: oxidation-reduction process	G	PF00106	IPR002347; IPR005979; IPR016040	GO:0016630; GO:0055114
58	TraesCS2D01G609500LC	TraesCS2D01G609500LC.1	1	--*	AT5G09910.5	Ras-related small GTP-binding family protein				G
59	TraesCS2D01G737800LC	TraesCS2D01G737800LC.1	1	--*	sp|O50202|ARC_RHOER	Proteasome-associated ATPase				G
60	TraesCS3A01G124400LC	TraesCS3A01G124400LC.1	1	--*	sp|Q5FVF4|TM7S3_RAT	Transmembrane 7 superfamily member 3				G
61	TraesCS3A01G353500LC	TraesCS3A01G353500LC.1	1	--*	AT2G16520.1	RING/U-box protein with C6HC-type zinc finger protein				TE?
62	TraesCS3A01G405700	TraesCS3A01G405700.1	1	--*	AT5G26040.2	histone deacetylase 2				G
63	TraesCS3A01G407700	TraesCS3A01G407700.1	1	***	tr|B9H7L8|B9H7L8_POPTR	F-box family protein	PF13516: Leucine Rich repeat	IPR001611: Leucine-rich repeat; IPR006553: Leucine-rich repeat, cysteine-containing subtype; IPR032675: Leucine-rich repeat domain, L domain-like	GO:0005515 MF: protein binding	G	PF13516	IPR001611; IPR006553; IPR032675	GO:0005515
64	TraesCS3B01G063100	TraesCS3B01G063100.1	1	***	tr|A0A077RVM2|A0A077RVM2_WHEAT	Non-specific lipid-transfer protein	PF00234: Protease inhibitor/seed storage/LTP family	IPR000528: Plant lipid transfer protein/Par allergen; IPR016140: Bifunctional inhibitor/plant lipid transfer protein/seed storage helical domain	GO:0006869 BP: lipid transport;GO:0008289 MF: lipid binding	G	PF00234	IPR000528; IPR016140	GO:0006869; GO:0008289
65	TraesCS3B01G272600	TraesCS3B01G272600.1	1	***	tr|U3RBI7|U3RBI7_CUCSA	Glutaredoxin	PF00462: Glutaredoxin	IPR002109: Glutaredoxin; IPR011905: Glutaredoxin-like, plant II; IPR012336: Thioredoxin-like fold	GO:0009055 MF: electron carrier activity;GO:0015035 MF: protein disulfide oxidoreductase activity;GO:0045454 BP: cell redox homeostasis	G	PF00462	IPR002109; IPR011905; IPR012336	GO:0009055; GO:0015035; GO:0045454
66	TraesCS3B01G395900	TraesCS3B01G395900.1	1	***	tr|M9P0B4|M9P0B4_CARPA	Gamma-glutamyl phosphate reductase	PF00696: Amino acid kinase family; PF00171: Aldehyde dehydrogenase family	IPR000965: GPR domain; IPR001048: Aspartate/glutamate/uridylate kinase; IPR001057: Glutamate/acetylglutamate kinase; IPR005715: Glutamate 5-kinase/delta-1-pyrroline-5-carboxylate synthase; IPR005766: Delta l-pyrroline-5-carboxylate synthetase; IPR015590: Aldehyde dehydrogenase domain; IPR016161: Aldehyde/histidinol dehydrogenase; IPR016162: Aldehyde dehydrogenase N-terminal domain; IPR019797: Glu…	GO:0003824 MF: catalytic activity;GO:0004349 MF: glutamate 5-kinase activity;GO:0004350 MF: glutamate-5-semialdehyde dehydrogenase activity;GO:0005737 CC: cytoplasm;GO:0006561 BP: proline biosynthetic process;GO:0008152 BP: metabolic process;GO:0016491 MF: oxidoreductase activity;GO:0055114 BP: oxidation-reduction process	G	PF00696; PF00171	IPR000965; IPR001048; IPR001057; IPR005715; IPR005766; IPR015590; IPR016161; IPR016162; IPR019797; IPR020593	GO:0003824; GO:0004349; GO:0004350; GO:0005737; GO:0006561; GO:0008152; GO:0016491; GO:0055114
67	TraesCS3B01G553600LC	TraesCS3B01G553600LC.1	1	--*	sp|Q5U431|GPR39_MOUSE	G-protein coupled receptor 39				G
68	TraesCS3B01G890400LC	TraesCS3B01G890400LC.1	1	--*	AT5G51200.3	nuclear pore complex protein (DUF3414)				G
69	TraesCS3D01G078600	TraesCS3D01G078600.1	1	***	tr|B6TFB6|B6TFB6_MAIZE	Stress responsive protein		IPR000772: Ricin B, lectin domain; IPR001849: Pleckstrin homology domain		G		IPR000772; IPR001849
70	TraesCS3D01G357200	TraesCS3D01G357200.2	0	***	tr|M9P0B4|M9P0B4_CARPA	Gamma-glutamyl phosphate reductase	PF00696: Amino acid kinase family; PF00171: Aldehyde dehydrogenase family	IPR000965: GPR domain; IPR001048: Aspartate/glutamate/uridylate kinase; IPR001057: Glutamate/acetylglutamate kinase; IPR005766: Delta l-pyrroline-5-carboxylate synthetase; IPR015590: Aldehyde dehydrogenase domain; IPR016161: Aldehyde/histidinol dehydrogenase; IPR016162: Aldehyde dehydrogenase N-terminal domain; IPR019797: Glutamate 5-kinase, conserved site; IPR020593: Gamma-glutamyl phosphate red…	GO:0003824 MF: catalytic activity;GO:0004349 MF: glutamate 5-kinase activity;GO:0004350 MF: glutamate-5-semialdehyde dehydrogenase activity;GO:0006561 BP: proline biosynthetic process;GO:0008152 BP: metabolic process;GO:0016491 MF: oxidoreductase activity;GO:0055114 BP: oxidation-reduction process	G	PF00696; PF00171	IPR000965; IPR001048; IPR001057; IPR005766; IPR015590; IPR016161; IPR016162; IPR019797; IPR020593	GO:0003824; GO:0004349; GO:0004350; GO:0006561; GO:0008152; GO:0016491; GO:0055114
71	TraesCS3D01G357200	TraesCS3D01G357200.1	1	***	tr|M9P0B4|M9P0B4_CARPA	Gamma-glutamyl phosphate reductase	PF00696: Amino acid kinase family; PF00171: Aldehyde dehydrogenase family	IPR000965: GPR domain; IPR001048: Aspartate/glutamate/uridylate kinase; IPR001057: Glutamate/acetylglutamate kinase; IPR005715: Glutamate 5-kinase/delta-1-pyrroline-5-carboxylate synthase; IPR005766: Delta l-pyrroline-5-carboxylate synthetase; IPR015590: Aldehyde dehydrogenase domain; IPR016161: Aldehyde/histidinol dehydrogenase; IPR016162: Aldehyde dehydrogenase N-terminal domain; IPR019797: Glu…	GO:0003824 MF: catalytic activity;GO:0004349 MF: glutamate 5-kinase activity;GO:0004350 MF: glutamate-5-semialdehyde dehydrogenase activity;GO:0005737 CC: cytoplasm;GO:0006561 BP: proline biosynthetic process;GO:0008152 BP: metabolic process;GO:0016491 MF: oxidoreductase activity;GO:0055114 BP: oxidation-reduction process	G	PF00696; PF00171	IPR000965; IPR001048; IPR001057; IPR005715; IPR005766; IPR015590; IPR016161; IPR016162; IPR019797; IPR020593	GO:0003824; GO:0004349; GO:0004350; GO:0005737; GO:0006561; GO:0008152; GO:0016491; GO:0055114
72	TraesCS3D01G433800	TraesCS3D01G433800.1	1	***	AT1G01630.1	Sec14p-like phosphatidylinositol transfer family protein	PF00650: CRAL/TRIO domain	IPR001251: CRAL-TRIO lipid binding domain; IPR011074: CRAL/TRIO, N-terminal domain		G	PF00650	IPR001251; IPR011074
73	TraesCS3D01G462000LC	TraesCS3D01G462000LC.1	1	--*	sp|B9KA80|DXR_THENN	1-deoxy-D-xylulose 5-phosphate reductoisomerase				G
74	TraesCS3D01G464600	TraesCS3D01G464600.1	1	--*	AT1G23230.3	mediator of RNA polymerase II transcription subunit				G
75	TraesCS4A01G015800LC	TraesCS4A01G015800LC.1	1	--*	sp|Q5YSV6|PNP_NOCFA	Polyribonucleotide nucleotidyltransferase				G
76	TraesCS4A01G244700	TraesCS4A01G244700.1	1	--*	AT1G67520.4	lectin protein kinase family protein				G
77	TraesCS4A01G272300	TraesCS4A01G272300.1	1	***	tr|A0A078G5I4|A0A078G5I4_BRANA	BnaA04g06320D protein				G
78	TraesCS4A01G290400	TraesCS4A01G290400.1	1	***	tr|M7YHQ6|M7YHQ6_TRIUA	Phosphomethylpyrimidine synthase	PF01964: Radical SAM ThiC family	IPR002817: Phosphomethylpyrimidine synthase	GO:0009228 BP: thiamine biosynthetic process;GO:0051536 MF: iron-sulfur cluster binding	G	PF01964	IPR002817	GO:0009228; GO:0051536
79	TraesCS4A01G446700	TraesCS4A01G446700.2	0	***	tr|A0A1D6SCP9|A0A1D6SCP9_WHEAT	Sucrose synthase	PF00862: Sucrose synthase	IPR000368: Sucrose synthase; IPR012820: Sucrose synthase, plant/cyanobacteria	GO:0005985 BP: sucrose metabolic process;GO:0016157 MF: sucrose synthase activity	G	PF00862	IPR000368; IPR012820	GO:0005985; GO:0016157
80	TraesCS4A01G446700	TraesCS4A01G446700.1	1	***	tr|A0A1D6SCP9|A0A1D6SCP9_WHEAT	Sucrose synthase	PF00862: Sucrose synthase; PF00534: Glycosyl transferases group 1	IPR000368: Sucrose synthase; IPR001296: Glycosyl transferase, family 1; IPR012820: Sucrose synthase, plant/cyanobacteria	GO:0005985 BP: sucrose metabolic process;GO:0016157 MF: sucrose synthase activity	G	PF00862; PF00534	IPR000368; IPR001296; IPR012820	GO:0005985; GO:0016157
81	TraesCS4A01G735400LC	TraesCS4A01G735400LC.1	1	***	tr|U3LKI5|U3LKI5_WHEAT	Argonaute	PF02170: PAZ domain; PF16488: Argonaute linker 2 domain; PF02171: Piwi domain	IPR003100: PAZ domain; IPR003165: Piwi domain; IPR012337: Ribonuclease H-like domain; IPR032472: Argonaute linker 2 domain	GO:0003676 MF: nucleic acid binding;GO:0005515 MF: protein binding	G	PF02170; PF16488; PF02171	IPR003100; IPR003165; IPR012337; IPR032472	GO:0003676; GO:0005515
82	TraesCS4B01G042500	TraesCS4B01G042500.1	1	*-*	tr|G7K296|G7K296_MEDTR	Fantastic four-like protein	PF11250: Fantastic Four meristem regulator	IPR021410: The fantastic four family		G	PF11250	IPR021410
83	TraesCS4B01G103700	TraesCS4B01G103700.2	1	*-*	tr|A0A0C9RJB2|A0A0C9RJB2_9SPER	Transcription elongation factor SPT5	PF03439: Early transcription elongation factor of RNA pol II, NGN section	IPR001574: Ribosome-inactivating protein; IPR005100: Transcription elongation factor Spt5, NGN domain; IPR006645: NusG, N-terminal	GO:0006355 BP: regulation of transcription, DNA-templated;GO:0017148 BP: negative regulation of translation;GO:0030598 MF: rRNA N-glycosylase activity	G	PF03439	IPR001574; IPR005100; IPR006645	GO:0006355; GO:0017148; GO:0030598
84	TraesCS4B01G103700	TraesCS4B01G103700.1	0	*-*	tr|A0A0C9RJB2|A0A0C9RJB2_9SPER	Transcription elongation factor SPT5	PF03439: Early transcription elongation factor of RNA pol II, NGN section	IPR001574: Ribosome-inactivating protein; IPR005100: Transcription elongation factor Spt5, NGN domain; IPR006645: NusG, N-terminal	GO:0006355 BP: regulation of transcription, DNA-templated;GO:0017148 BP: negative regulation of translation;GO:0030598 MF: rRNA N-glycosylase activity	G	PF03439	IPR001574; IPR005100; IPR006645	GO:0006355; GO:0017148; GO:0030598
85	TraesCS4B01G206600LC	TraesCS4B01G206600LC.1	1	--*	AT5G26220.2	ChaC-like family protein				G
86	TraesCS4D01G131100	TraesCS4D01G131100.1	1	***	tr|A0A199V9T9|A0A199V9T9_ANACO	Calcium-binding protein	PF13833: EF-hand domain pair	IPR002048: EF-hand domain; IPR011992: EF-hand domain pair; IPR018247: EF-Hand 1, calcium-binding site	GO:0005509 MF: calcium ion binding	G	PF13833	IPR002048; IPR011992; IPR018247	GO:0005509
87	TraesCS4D01G229600	TraesCS4D01G229600.1	1	--*	AT4G00830.6	RNA-binding (RRM/RBD/RNP motifs) family protein				G
88	TraesCS4D01G249000	TraesCS4D01G249000.1	1	--*	AT1G30460.1	cleavage and polyadenylation specificity factor 30				G
89	TraesCS4D01G371300LC	TraesCS4D01G371300LC.1	1	*-*	tr|Q5VL33|Q5VL33_9LILI	ATP synthase subunit alpha	PF00006: ATP synthase alpha/beta family, nucleotide-binding domain	IPR000194: ATPase, F1/V1/A1 complex, alpha/beta subunit, nucleotide-binding domain; IPR027417: P-loop containing nucleoside triphosphate hydrolase	GO:0005524 MF: ATP binding	G	PF00006	IPR000194; IPR027417	GO:0005524
90	TraesCS4D01G405800LC	TraesCS4D01G405800LC.1	1	--*	AT2G47030.1	Plant invertase/pectin methylesterase inhibitor superfamily				G
91	TraesCS5A01G238000	TraesCS5A01G238000.1	1	***	tr|G7JL85|G7JL85_MEDTR	Cytochrome P450 family ABA 8'-hydroxylase	PF00067: Cytochrome P450	IPR001128: Cytochrome P450; IPR002401: Cytochrome P450, E-class, group I; IPR017972: Cytochrome P450, conserved site	GO:0005506 MF: iron ion binding;GO:0016705 MF: oxidoreductase activity, acting on paired donors, with incorporation or reduction of molecular oxygen;GO:0020037 MF: heme binding;GO:0055114 BP: oxidation-reduction process	G	PF00067	IPR001128; IPR002401; IPR017972	GO:0005506; GO:0016705; GO:0020037; GO:0055114
92	TraesCS5A01G241400LC	TraesCS5A01G241400LC.1	1	--*	AT4G32590.5	2Fe-2S ferredoxin-like superfamily protein				G
93	TraesCS5A01G466300LC	TraesCS5A01G466300LC.1	1	*-*	tr|Q2QPA8|Q2QPA8_ORYSJ	HAT family dimerisation domain containing protein	PF05699: hAT family C-terminal dimerisation region	IPR008906: HAT, C-terminal dimerisation domain; IPR012337: Ribonuclease H-like domain	GO:0003676 MF: nucleic acid binding;GO:0046983 MF: protein dimerization activity	TE	PF05699	IPR008906; IPR012337	GO:0003676; GO:0046983
94	TraesCS5B01G423500	TraesCS5B01G423500.1	1	--*	AT5G26040.1	histone deacetylase 2				G
95	TraesCS5B01G639700LC	TraesCS5B01G639700LC.1	1	--*	AT3G63460.3	transducin family protein / WD-40 repeat family protein				G
96	TraesCS5D01G023700	TraesCS5D01G023700.1	1	*-*	sp|Q6CQE5|TAR1_KLULA	Protein TAR1				G
97	TraesCS5D01G244900	TraesCS5D01G244900.1	1	***	tr|G7JL85|G7JL85_MEDTR	Cytochrome P450 family ABA 8'-hydroxylase	PF00067: Cytochrome P450	IPR001128: Cytochrome P450; IPR002401: Cytochrome P450, E-class, group I; IPR017972: Cytochrome P450, conserved site	GO:0005506 MF: iron ion binding;GO:0016705 MF: oxidoreductase activity, acting on paired donors, with incorporation or reduction of molecular oxygen;GO:0020037 MF: heme binding;GO:0055114 BP: oxidation-reduction process	G	PF00067	IPR001128; IPR002401; IPR017972	GO:0005506; GO:0016705; GO:0020037; GO:0055114
98	TraesCS5D01G294400LC	TraesCS5D01G294400LC.1	1	--*	sp|O64564|HS185_ARATH	18.5 kDa class IV heat shock protein				G
99	TraesCS5D01G310500	TraesCS5D01G310500.1	1	***	tr|A0A072TWU1|A0A072TWU1_MEDTR	NADP-dependent alkenal double bond reductase	PF16884: N-terminal domain of oxidoreductase; PF00107: Zinc-binding dehydrogenase	IPR011032: GroES-like; IPR013149: Alcohol dehydrogenase, C-terminal; IPR016040: NAD(P)-binding domain; IPR020843: Polyketide synthase, enoylreductase domain	GO:0016491 MF: oxidoreductase activity;GO:0055114 BP: oxidation-reduction process	G	PF16884; PF00107	IPR011032; IPR013149; IPR016040; IPR020843	GO:0016491; GO:0055114
100	TraesCS5D01G488100	TraesCS5D01G488100.1	1	--*	AT5G24350.3	neuroblastoma-amplified sequence protein				G
101	TraesCS5D01G491900	TraesCS5D01G491900.1	1	***	tr|Q43655|Q43655_WHEAT	Actin depolymerizing factor	PF00241: Cofilin/tropomyosin-type actin-binding protein	IPR002108: Actin-depolymerising factor homology domain; IPR029006: ADF-H/Gelsolin-like domain	GO:0003779 MF: actin binding;GO:0005622 CC: intracellular	G	PF00241	IPR002108; IPR029006	GO:0003779; GO:0005622
102	TraesCS5D01G658500LC	TraesCS5D01G658500LC.1	1	--*	AT2G36360.5	Galactose oxidase/kelch repeat superfamily protein				G
103	TraesCS5D01G658900LC	TraesCS5D01G658900LC.1	1	--*	sp|P43737|RPOA_HAEIN	DNA-directed RNA polymerase subunit alpha				G
104	TraesCS6B01G111700LC	TraesCS6B01G111700LC.1	1	--*	sp|Q87XS2|RAPA_PSESM	RNA polymerase-associated protein RapA				G
105	TraesCS6B01G173200LC	TraesCS6B01G173200LC.1	1	--*	AT1G67520.6	lectin protein kinase family protein				G
106	TraesCS6B01G402800	TraesCS6B01G402800.1	1	***	tr|A0A078G5I4|A0A078G5I4_BRANA	BnaA04g06320D protein				G
107	TraesCS6B01G445600LC	TraesCS6B01G445600LC.1	1	--*	sp|Q55170|UVRB_SYNY3	UvrABC system protein B				G
108	TraesCS6B01G497300LC	TraesCS6B01G497300LC.1	1	--*	sp|Q9HCC9|LST2_HUMAN	Lateral signaling target protein 2 homolog				G
109	TraesCS6D01G177100LC	TraesCS6D01G177100LC.1	1	*-*	tr|E9KJ29|E9KJ29_9ORYZ	NAD(P)H-quinone oxidoreductase subunit J, chloroplastic				G
110	TraesCS6D01G210400LC	TraesCS6D01G210400LC.1	1	--*	sp|P97313|PRKDC_MOUSE	DNA-dependent protein kinase catalytic subunit				G
111	TraesCS6D01G294400LC	TraesCS6D01G294400LC.1	1	--*	AT5G61060.2	histone deacetylase 5				G
112	TraesCS7A01G017200	TraesCS7A01G017200.1	1	--*	AT3G14980.6	Acyl-CoA N-acyltransferase with RING/FYVE/PHD-type zinc finger protein				G
113	TraesCS7A01G146400LC	TraesCS7A01G146400LC.1	1	*-*	tr|A0A1D6BSP9|A0A1D6BSP9_WHEAT	3-ketoacyl-CoA synthase	PF02797: Chalcone and stilbene synthases, C-terminal domain	IPR012328: Chalcone/stilbene synthase, C-terminal; IPR016039: Thiolase-like	GO:0003824 MF: catalytic activity;GO:0008152 BP: metabolic process	G	PF02797	IPR012328; IPR016039	GO:0003824; GO:0008152
114	TraesCS7A01G203900	TraesCS7A01G203900.1	1	***	tr|G7J9C3|G7J9C3_MEDTR	Nudix hydrolase-like protein	PF00293: NUDIX domain	IPR000086: NUDIX hydrolase domain; IPR015797: NUDIX hydrolase domain-like; IPR020084: NUDIX hydrolase, conserved site	GO:0016787 MF: hydrolase activity	G	PF00293	IPR000086; IPR015797; IPR020084	GO:0016787
115	TraesCS7A01G405900LC	TraesCS7A01G405900LC.1	1	***	tr|A0A0K1Z9Q9|A0A0K1Z9Q9_9ASTR	Photosystem I iron-sulfur center	PF14697: 4Fe-4S dicluster domain	IPR017896: 4Fe-4S ferredoxin-type, iron-sulphur binding domain; IPR017900: 4Fe-4S ferredoxin, iron-sulphur binding, conserved site		G	PF14697	IPR017896; IPR017900
116	TraesCS7A01G542600LC	TraesCS7A01G542600LC.1	1	*-*	tr|A0A072TJH8|A0A072TJH8_MEDTR	Senescence-associated protein, putative				G
117	TraesCS7A01G555800LC	TraesCS7A01G555800LC.1	1	***	tr|E9KJE3|E9KJE3_9ORYZ	Ribosomal protein L2				G
118	TraesCS7A01G747200LC	TraesCS7A01G747200LC.1	1	--*	tr|N1QTI3|N1QTI3_AEGTA	Speckle-type POZ protein-like protein		IPR008974: TRAF-like	GO:0005515 MF: protein binding	G		IPR008974	GO:0005515
119	TraesCS7B01G005100	TraesCS7B01G005100.1	1	***	tr|M8CRM6|M8CRM6_AEGTA	Anthocyanin 5-aromatic acyltransferase	PF02458: Transferase family	IPR003480: Transferase	GO:0016747 MF: transferase activity, transferring acyl groups other than amino-acyl groups	G	PF02458	IPR003480	GO:0016747
120	TraesCS7B01G227900	TraesCS7B01G227900.1	1	***	tr|B9S2W5|B9S2W5_RICCO	Metal transporter, putative	PF01566: Natural resistance-associated macrophage protein	IPR001046: NRAMP family	GO:0005215 MF: transporter activity;GO:0006810 BP: transport;GO:0016020 CC: membrane	G	PF01566	IPR001046	GO:0005215; GO:0006810; GO:0016020
121	TraesCS7B01G358500LC	TraesCS7B01G358500LC.1	1	*-*	tr|A0A0F6NLZ2|A0A0F6NLZ2_VICSA	NAD(P)H-quinone oxidoreductase subunit 2, chloroplastic	PF00361: Proton-conducting membrane transporter	IPR001750: NADH:quinone oxidoreductase/Mrp antiporter, membrane subunit		G	PF00361	IPR001750
122	TraesCS7B01G393200	TraesCS7B01G393200.1	1	***	tr|A0A1D6C504|A0A1D6C504_WHEAT	WAT1-related protein	PF00892: EamA-like transporter family	IPR000620: EamA domain	GO:0016020 CC: membrane;GO:0016021 CC: integral component of membrane	G	PF00892	IPR000620	GO:0016020; GO:0016021
123	TraesCS7B01G666000LC	TraesCS7B01G666000LC.1	1	--*	AT3G09920.4	phosphatidyl inositol monophosphate 5 kinase				G
124	TraesCS7B01G816900LC	TraesCS7B01G816900LC.1	1	--*	AT4G23470.3	PLAC8 family protein				G
125	TraesCS7D01G042500LC	TraesCS7D01G042500LC.1	1	***	tr|Q58U57|Q58U57_BROAV	Ribulose bisphosphate carboxylase large chain	PF02788: Ribulose bisphosphate carboxylase large chain, N-terminal domain; PF00016: Ribulose bisphosphate carboxylase large chain, catalytic domain	IPR000685: Ribulose bisphosphate carboxylase, large subunit, C-terminal; IPR017443: Ribulose bisphosphate carboxylase, large subunit, ferrodoxin-like N-terminal; IPR020878: Ribulose bisphosphate carboxylase, large chain, active site	GO:0000287 MF: magnesium ion binding;GO:0015977 BP: carbon fixation;GO:0016984 MF: ribulose-bisphosphate carboxylase activity	G	PF02788; PF00016	IPR000685; IPR017443; IPR020878	GO:0000287; GO:0015977; GO:0016984
126	TraesCS7D01G079600LC	TraesCS7D01G079600LC.1	1	*-*	tr|A0A151RSC1|A0A151RSC1_CAJCA	Retrotransposable element Tf2				TE
127	TraesCS7D01G119200	TraesCS7D01G119200.1	1	--*	AT1G67520.4	lectin protein kinase family protein				G
128	TraesCS7D01G124000	TraesCS7D01G124000.1	1	--*	AT5G26040.2	histone deacetylase 2				G
129	TraesCS7D01G147500LC	TraesCS7D01G147500LC.1	1	--*	sp|A2S4E7|Y3126_BURM9	UPF0176 protein BMA10229_A0826				G
130	TraesCS7D01G147900LC	TraesCS7D01G147900LC.1	1	--*	AT5G60610.2	F-box/RNI-like superfamily protein				TE?
131	TraesCS7D01G148000LC	TraesCS7D01G148000LC.1	1	*-*	tr|A0A072TJH8|A0A072TJH8_MEDTR	Senescence-associated protein, putative				G
132	TraesCS7D01G148200LC	TraesCS7D01G148200LC.1	1	*-*	tr|A0A072THY2|A0A072THY2_MEDTR	Senescence-associated protein, putative				G
133	TraesCS7D01G155400LC	TraesCS7D01G155400LC.1	1	*-*	sp|B7K238|RL14_CYAP8	50S ribosomal protein L14	PF00238: Ribosomal protein L14p/L23e	IPR000218: Ribosomal protein L14P	GO:0003735 MF: structural constituent of ribosome;GO:0005840 CC: ribosome;GO:0006412 BP: translation	G	PF00238	IPR000218	GO:0003735; GO:0005840; GO:0006412
134	TraesCS7D01G424500LC	TraesCS7D01G424500LC.1	1	--*	tr|A0A1E5WF84|A0A1E5WF84_9POAL	Receptor protein kinase-like protein	PF05162: Ribosomal protein L41	IPR007836: Ribosomal protein L41	GO:0003735 MF: structural constituent of ribosome;GO:0005840 CC: ribosome;GO:0006412 BP: translation	G	PF05162	IPR007836	GO:0003735; GO:0005840; GO:0006412
135	TraesCS7D01G434700LC	TraesCS7D01G434700LC.1	1	--*	sp|P9WHN3|PURA_MYCTU	Adenylosuccinate synthetase				G
136	TraesCS7D01G485700	TraesCS7D01G485700.1	1	***	tr|R7VZB3|R7VZB3_AEGTA	Histone H2B	PF00125: Core histone H2A/H2B/H3/H4	IPR000558: Histone H2B; IPR007125: Histone H2A/H2B/H3; IPR009072: Histone-fold	GO:0000786 CC: nucleosome;GO:0003677 MF: DNA binding;GO:0046982 MF: protein heterodimerization activity	G	PF00125	IPR000558; IPR007125; IPR009072	GO:0000786; GO:0003677; GO:0046982
137	TraesCSU01G009200LC	TraesCSU01G009200LC.1	1	*-*	tr|A0A072TJH8|A0A072TJH8_MEDTR	Senescence-associated protein, putative				G
138	TraesCSU01G014700	TraesCSU01G014700.1	1	*-*	tr|A0A1J3ESH1|A0A1J3ESH1_NOCCA	F-box protein	PF00646: F-box domain	IPR001810: F-box domain; IPR032675: Leucine-rich repeat domain, L domain-like	GO:0005515 MF: protein binding	TE?	PF00646	IPR001810; IPR032675	GO:0005515
139	TraesCSU01G075700	TraesCSU01G075700.1	1	--*	AT1G67520.6	lectin protein kinase family protein				G
140	TraesCSU01G217000	TraesCSU01G217000.1	1	***	tr|A0A072TU33|A0A072TU33_MEDTR	Eukaryotic aspartyl protease family protein	PF14543: Xylanase inhibitor N-terminal; PF14541: Xylanase inhibitor C-terminal	IPR021109: Aspartic peptidase domain; IPR032799: Xylanase inhibitor, C-terminal; IPR032861: Xylanase inhibitor, N-terminal; IPR033121: Peptidase family A1 domain		G	PF14543; PF14541	IPR021109; IPR032799; IPR032861; IPR033121
141	TraesCSU01G258100	TraesCSU01G258100.1	1	--*	AT1G67520.3	lectin protein kinase family protein				G
142	TraesCSU01G258900	TraesCSU01G258900.1	1	--*	sp|Q9A2V8|ATPG_CAUCR	ATP synthase gamma chain				G
143	TraesCSU01G260700	TraesCSU01G260700.1	1	--*	AT4G30310.2	FGGY family of carbohydrate kinase				G
144	TraesCSU01G261100	TraesCSU01G261100.1	1	--*	sp|Q0CBX9|SRB8_ASPTN	Mediator of RNA polymerase II transcription subunit 12				G
145	TraesCSU01G263200	TraesCSU01G263200.1	1	--*	sp|Q0CBX9|SRB8_ASPTN	Mediator of RNA polymerase II transcription subunit 12				G
146	TraesCSU01G263300	TraesCSU01G263300.1	1	--*	sp|Q0CBX9|SRB8_ASPTN	Mediator of RNA polymerase II transcription subunit 12				G
147	TraesCSU01G264900	TraesCSU01G264900.1	1	--*	AT3G27700.2	zinc finger (CCCH-type) family protein / RNA recognition motif (RRM)-containing protein				TE?
148	TraesCSU01G267700	TraesCSU01G267700.1	1	--*	sp|Q9A2V8|ATPG_CAUCR	ATP synthase gamma chain				G
149	TraesCSU01G269900	TraesCSU01G269900.1	1	--*	sp|A6X1V9|ARGC_OCHA4	N-acetyl-gamma-glutamyl-phosphate reductase				G
150	TraesCSU01G271600	TraesCSU01G271600.1	1	--*	sp|Q9Y794|ORC4_SCHPO	Origin recognition complex subunit 4				G
151	TraesCSU01G307400LC	TraesCSU01G307400LC.1	1	*-*	tr|A0A072TJH8|A0A072TJH8_MEDTR	Senescence-associated protein, putative				G
152	TraesCSU01G308300LC	TraesCSU01G308300LC.1	1	--*	AT5G62090.3	SEUSS-like 2				G
153	TraesCSU01G321600LC	TraesCSU01G321600LC.1	1	*-*	tr|A0A072TJH8|A0A072TJH8_MEDTR	Senescence-associated protein, putative				G
154	TraesCSU01G321700LC	TraesCSU01G321700LC.1	1	*-*	tr|A0A072TJH8|A0A072TJH8_MEDTR	Senescence-associated protein, putative				G
155	TraesCSU01G581600LC	TraesCSU01G581600LC.1	1	*-*	tr|A0A072TJH8|A0A072TJH8_MEDTR	Senescence-associated protein, putative				G
156	TraesCSU01G597600LC	TraesCSU01G597600LC.1	1	*-*	tr|A0A072TJH8|A0A072TJH8_MEDTR	Senescence-associated protein, putative				G
157	TraesCSU01G612300LC	TraesCSU01G612300LC.1	1	*-*	tr|A0A072TJH8|A0A072TJH8_MEDTR	Senescence-associated protein, putative				G
158	TraesCSU01G619400LC	TraesCSU01G619400LC.1	1	--*	sp|Q9A2V8|ATPG_CAUCR	ATP synthase gamma chain				G
159	TraesCSU01G619700LC	TraesCSU01G619700LC.1	1	--*	sp|Q1I4U6|YACG_PSEE4	DNA gyrase inhibitor YacG				G

## Sheet: DOWN_DEG_function_annotation
TABLE S6B Functional annotation of DEGs down-regulated in wheat-rye hybrids vs. triticale (both containing Ph1)
	gene	Gene.ID	is_repr	AHRD.Quality.Code	Blast.Hit.Accession	Human.Readable.Description	Pfam.IDs..Description.	Interpro.IDs..Description.	GO.IDs..Description..via.Interpro	Gene.or.TE.TE..U..via.function.	Pfam.IDs	Interpro.IDs	GO.IDs.via.Interpro
1	TraesCS1A01G016800LC	TraesCS1A01G016800LC.1	1	--*	sp|B7K339|PNP_CYAP8	Polyribonucleotide nucleotidyltransferase				G
2	TraesCS1A01G118900	TraesCS1A01G118900.1	1	***	tr|A0A1J6IUM0|A0A1J6IUM0_NICAT	Protein tapetum determinant 1				G
3	TraesCS1A01G220400	TraesCS1A01G220400.1	1	***	tr|A0A199UN28|A0A199UN28_ANACO	Cell number regulator 6	PF04749: PLAC8 family	IPR006461: PLAC8 motif-containing protein		G	PF04749	IPR006461
4	TraesCS1A01G252600	TraesCS1A01G252600.1	1	*-*	tr|A0A059PRT6|A0A059PRT6_SALMI	MYB-related transcription factor	PF00249: Myb-like DNA-binding domain	IPR001005: SANT/Myb domain; IPR009057: Homeobox domain-like; IPR017930: Myb domain	GO:0003677 MF: DNA binding	G	PF00249	IPR001005; IPR009057; IPR017930	GO:0003677
5	TraesCS1A01G354300	TraesCS1A01G354300.1	1	***	AT5G43400.1	plant/protein	PF11443: Domain of unknown function (DUF2828)	IPR002035: von Willebrand factor, type A; IPR024553: Domain of unknown function DUF2828		G	PF11443	IPR002035; IPR024553
6	TraesCS1B01G048400	TraesCS1B01G048400.2	1	***	tr|M8C1N0|M8C1N0_AEGTA	Phenylalanine ammonia-lyase	PF00221: Aromatic amino acid lyase	IPR001106: Aromatic amino acid lyase; IPR005922: Phenylalanine ammonia-lyase; IPR008948: L-Aspartase-like; IPR022313: Phenylalanine/histidine ammonia-lyases, active site; IPR023144: Phenylalanine ammonia-lyase, shielding domain; IPR024083: Fumarase/histidase, N-terminal	GO:0003824 MF: catalytic activity;GO:0005737 CC: cytoplasm;GO:0006559 BP: L-phenylalanine catabolic process;GO:0016841 MF: ammonia-lyase activity	G	PF00221	IPR001106; IPR005922; IPR008948; IPR022313; IPR023144; IPR024083	GO:0003824; GO:0005737; GO:0006559; GO:0016841
7	TraesCS1B01G048400	TraesCS1B01G048400.1	0	***	tr|M8C1N0|M8C1N0_AEGTA	Phenylalanine ammonia-lyase	PF00221: Aromatic amino acid lyase	IPR001106: Aromatic amino acid lyase; IPR005922: Phenylalanine ammonia-lyase; IPR008948: L-Aspartase-like; IPR022313: Phenylalanine/histidine ammonia-lyases, active site; IPR023144: Phenylalanine ammonia-lyase, shielding domain; IPR024083: Fumarase/histidase, N-terminal	GO:0003824 MF: catalytic activity;GO:0005737 CC: cytoplasm;GO:0006559 BP: L-phenylalanine catabolic process;GO:0016841 MF: ammonia-lyase activity	G	PF00221	IPR001106; IPR005922; IPR008948; IPR022313; IPR023144; IPR024083	GO:0003824; GO:0005737; GO:0006559; GO:0016841
8	TraesCS1B01G097600LC	TraesCS1B01G097600LC.1	1	--*	sp|Q80ZF8|AGRB3_MOUSE	Adhesion G protein-coupled receptor B3				G
9	TraesCS1B01G113700	TraesCS1B01G113700.1	1	***	tr|M1HIR7|M1HIR7_ELAGV	Glutathione S-transferase	PF02798: Glutathione S-transferase, N-terminal domain; PF00043: Glutathione S-transferase, C-terminal domain	IPR004045: Glutathione S-transferase, N-terminal; IPR004046: Glutathione S-transferase, C-terminal; IPR010987: Glutathione S-transferase, C-terminal-like; IPR012336: Thioredoxin-like fold	GO:0005515 MF: protein binding	G	PF02798; PF00043	IPR004045; IPR004046; IPR010987; IPR012336	GO:0005515
10	TraesCS1B01G141000	TraesCS1B01G141000.1	1	--*	sp|Q7Z6L1|TCPR1_HUMAN	Tectonin beta-propeller repeat-containing protein 1				G
11	TraesCS1B01G218100	TraesCS1B01G218100.1	0	--*	AT2G02030.1	F-box family protein		IPR001810: F-box domain	GO:0005515 MF: protein binding	TE?		IPR001810	GO:0005515
12	TraesCS1B01G218100	TraesCS1B01G218100.2	1	--*	AT2G02030.1	F-box family protein		IPR001810: F-box domain	GO:0005515 MF: protein binding	TE?		IPR001810	GO:0005515
13	TraesCS1B01G265400	TraesCS1B01G265400.1	1	*-*	tr|A0A059PRT6|A0A059PRT6_SALMI	MYB-related transcription factor	PF00249: Myb-like DNA-binding domain	IPR001005: SANT/Myb domain; IPR009057: Homeobox domain-like; IPR017930: Myb domain	GO:0003677 MF: DNA binding	G	PF00249	IPR001005; IPR009057; IPR017930	GO:0003677
14	TraesCS1B01G299700	TraesCS1B01G299700.1	1	***	tr|M7YUQ7|M7YUQ7_TRIUA	Blue copper protein	PF02298: Plastocyanin-like domain	IPR003245: Phytocyanin domain; IPR008972: Cupredoxin	GO:0009055 MF: electron carrier activity	G	PF02298	IPR003245; IPR008972	GO:0009055
15	TraesCS1B01G328000	TraesCS1B01G328000.1	1	--*	tr|A0A1J3FIK4|A0A1J3FIK4_NOCCA	U3 small nucleolar RNA-associated protein 15-like protein				G
16	TraesCS1B01G620800LC	TraesCS1B01G620800LC.1	1	*-*	tr|L0AR00|L0AR00_LEYCH	Salt-induced protein				G
17	TraesCS1D01G021400	TraesCS1D01G021400.1	1	-**	tr|H6WNA3|H6WNA3_9FABA	Trypsin inhibitor	PF00228: Bowman-Birk serine protease inhibitor family	IPR000877: Proteinase inhibitor I12, Bowman-Birk	GO:0004867 MF: serine-type endopeptidase inhibitor activity;GO:0005576 CC: extracellular region	G	PF00228	IPR000877	GO:0004867; GO:0005576
18	TraesCS1D01G022000	TraesCS1D01G022000.1	1	-**	tr|Q84X88|Q84X88_VIGUU	Trypsin inhibitor	PF00228: Bowman-Birk serine protease inhibitor family	IPR000877: Proteinase inhibitor I12, Bowman-Birk	GO:0004867 MF: serine-type endopeptidase inhibitor activity;GO:0005576 CC: extracellular region	G	PF00228	IPR000877	GO:0004867; GO:0005576
19	TraesCS1D01G080600	TraesCS1D01G080600.1	1	***	tr|W5AK71|W5AK71_WHEAT	Peroxidase	PF00141: Peroxidase	IPR000823: Plant peroxidase; IPR002016: Haem peroxidase, plant/fungal/bacterial; IPR010255: Haem peroxidase; IPR019793: Peroxidases heam-ligand binding site; IPR019794: Peroxidase, active site	GO:0004601 MF: peroxidase activity;GO:0006979 BP: response to oxidative stress;GO:0020037 MF: heme binding;GO:0055114 BP: oxidation-reduction process	G	PF00141	IPR000823; IPR002016; IPR010255; IPR019793; IPR019794	GO:0004601; GO:0006979; GO:0020037; GO:0055114
20	TraesCS1D01G099200LC	TraesCS1D01G099200LC.1	1	--*	sp|Q0V9G5|UBP44_XENTR	Ubiquitin carboxyl-terminal hydrolase 44				G
21	TraesCS1D01G204200LC	TraesCS1D01G204200LC.1	1	--*	tr|G7J9N5|G7J9N5_MEDTR	SPFH domain/band 7 family protein				G
22	TraesCS1D01G355700LC	TraesCS1D01G355700LC.1	1	--*	AT4G08480.1	mitogen-activated protein kinase kinase kinase 9				G
23	TraesCS2A01G028500LC	TraesCS2A01G028500LC.1	1	--*	tr|Q2R3J5|Q2R3J5_ORYSJ	Retrotransposon protein, putative, Ty1-copia subclass				TE
24	TraesCS2A01G057100LC	TraesCS2A01G057100LC.1	1	--*	sp|C4R702|ALOX2_KOMPG	Alcohol oxidase 2				G
25	TraesCS2A01G065700	TraesCS2A01G065700.1	1	***	tr|B2M0U5|B2M0U5_MANES	Aquaporin	PF00230: Major intrinsic protein	IPR000425: Major intrinsic protein; IPR022357: Major intrinsic protein, conserved site; IPR023271: Aquaporin-like	GO:0005215 MF: transporter activity;GO:0006810 BP: transport;GO:0016020 CC: membrane	G	PF00230	IPR000425; IPR022357; IPR023271	GO:0005215; GO:0006810; GO:0016020
26	TraesCS2A01G099900	TraesCS2A01G099900.1	1	***	tr|U5NIQ9|U5NIQ9_9POAL	Ethylene insensitive 3	PF04873: Ethylene insensitive 3	IPR023278: Ethylene insensitive 3-like protein, DNA-binding domain	GO:0003700 MF: transcription factor activity, sequence-specific DNA binding;GO:0005634 CC: nucleus	G	PF04873	IPR023278	GO:0003700; GO:0005634
27	TraesCS2A01G169600	TraesCS2A01G169600.1	1	***	tr|D7LBV7|D7LBV7_ARALL	SPX domain-containing protein	PF03105: SPX domain	IPR004331: SPX domain		G	PF03105	IPR004331
28	TraesCS2A01G241700LC	TraesCS2A01G241700LC.1	1	*-*	sp|Q9M0F9|PFKA1_ARATH	ATP-dependent 6-phosphofructokinase 1	PF00078: Reverse transcriptase (RNA-dependent DNA polymerase); PF13966: zinc-binding in reverse transcriptase; PF00365: Phosphofructokinase	IPR000023: Phosphofructokinase domain; IPR000477: Reverse transcriptase domain; IPR005135: Endonuclease/exonuclease/phosphatase; IPR026960: Reverse transcriptase zinc-binding domain	GO:0003872 MF: 6-phosphofructokinase activity;GO:0006096 BP: glycolytic process	TE?	PF00078; PF13966; PF00365	IPR000023; IPR000477; IPR005135; IPR026960	GO:0003872; GO:0006096
29	TraesCS2A01G388600	TraesCS2A01G388600.1	1	***	tr|A0A124SC44|A0A124SC44_CYNCS	COBRA-like protein	PF04833: COBRA-like protein	IPR006918: COBRA, plant	GO:0010215 BP: cellulose microfibril organization;GO:0016049 BP: cell growth;GO:0031225 CC: anchored component of membrane	G	PF04833	IPR006918	GO:0010215; GO:0016049; GO:0031225
30	TraesCS2A01G411200	TraesCS2A01G411200.1	1	***	tr|B9R9S6|B9R9S6_RICCO	Glycerol-3-phosphate transporter, putative	PF07690: Major Facilitator Superfamily	IPR000849: Sugar phosphate transporter; IPR011701: Major facilitator superfamily; IPR020846: Major facilitator superfamily domain	GO:0005215 MF: transporter activity;GO:0006810 BP: transport;GO:0016021 CC: integral component of membrane;GO:0055085 BP: transmembrane transport	G	PF07690	IPR000849; IPR011701; IPR020846	GO:0005215; GO:0006810; GO:0016021; GO:0055085
31	TraesCS2A01G507300	TraesCS2A01G507300.1	1	***	tr|M7YSG5|M7YSG5_TRIUA	Nuclease S1	PF02265: S1/P1 Nuclease	IPR003154: S1/P1 nuclease; IPR008947: Phospholipase C/P1 nuclease domain	GO:0003676 MF: nucleic acid binding;GO:0004519 MF: endonuclease activity;GO:0006308 BP: DNA catabolic process;GO:0016788 MF: hydrolase activity, acting on ester bonds	G	PF02265	IPR003154; IPR008947	GO:0003676; GO:0004519; GO:0006308; GO:0016788
32	TraesCS2B01G077700	TraesCS2B01G077700.1	1	***	tr|B2M0U5|B2M0U5_MANES	Aquaporin	PF00230: Major intrinsic protein	IPR000425: Major intrinsic protein; IPR022357: Major intrinsic protein, conserved site; IPR023271: Aquaporin-like	GO:0005215 MF: transporter activity;GO:0006810 BP: transport;GO:0016020 CC: membrane	G	PF00230	IPR000425; IPR022357; IPR023271	GO:0005215; GO:0006810; GO:0016020
33	TraesCS2B01G102200LC	TraesCS2B01G102200LC.1	1	--*	AT5G62760.1	P-loop containing nucleoside triphosphate hydrolases superfamily protein				G
34	TraesCS2B01G159700LC	TraesCS2B01G159700LC.1	1	*-*	tr|A0A0B0NKZ0|A0A0B0NKZ0_GOSAR	NAC domain-containing protein	PF02365: No apical meristem (NAM) protein	IPR003441: NAC domain; IPR013763: Cyclin-like	GO:0003677 MF: DNA binding;GO:0006355 BP: regulation of transcription, DNA-templated	G	PF02365	IPR003441; IPR013763	GO:0003677; GO:0006355
35	TraesCS2B01G187700	TraesCS2B01G187700.1	1	*-*	AT5G63930.1	Leucine-rich repeat protein kinase family protein	PF08263: Leucine rich repeat N-terminal domain	IPR013210: Leucine-rich repeat-containing N-terminal, plant-type; IPR032675: Leucine-rich repeat domain, L domain-like		G	PF08263	IPR013210; IPR032675
36	TraesCS2B01G195900	TraesCS2B01G195900.1	1	***	tr|D7LBV7|D7LBV7_ARALL	SPX domain-containing protein	PF03105: SPX domain	IPR004331: SPX domain		G	PF03105	IPR004331
37	TraesCS2B01G259700LC	TraesCS2B01G259700LC.1	1	*-*	tr|A0A1D5WK83|A0A1D5WK83_WHEAT	Glycosyltransferase				G
38	TraesCS2B01G303200	TraesCS2B01G303200.1	1	***	tr|B6T3E4|B6T3E4_MAIZE	Glycerophosphodiester phosphodiesterase	PF03009: Glycerophosphoryl diester phosphodiesterase family	IPR017946: PLC-like phosphodiesterase, TIM beta/alpha-barrel domain; IPR030395: Glycerophosphodiester phosphodiesterase domain	GO:0006629 BP: lipid metabolic process;GO:0008081 MF: phosphoric diester hydrolase activity	G	PF03009	IPR017946; IPR030395	GO:0006629; GO:0008081
39	TraesCS2B01G368300LC	TraesCS2B01G368300LC.1	1	***	tr|A0A1D1ZCU0|A0A1D1ZCU0_9ARAE	Retrovirus-related Pol polyprotein from transposon TNT 1-94	PF00098: Zinc knuckle	IPR001878: Zinc finger, CCHC-type	GO:0003676 MF: nucleic acid binding;GO:0008270 MF: zinc ion binding	TE	PF00098	IPR001878	GO:0003676; GO:0008270
40	TraesCS2B01G399600LC	TraesCS2B01G399600LC.1	1	--*	AT2G43760.3	molybdopterin biosynthesis MoaE family protein				G
41	TraesCS2B01G413000	TraesCS2B01G413000.1	1	***	tr|A0A061G1L6|A0A061G1L6_THECC	2-oxoglutarate (2OG) and Fe(II)-dependent oxygenase superfamily protein	PF14226: non-haem dioxygenase in morphine synthesis N-terminal; PF03171: 2OG-Fe(II) oxygenase superfamily	IPR005123: Oxoglutarate/iron-dependent dioxygenase; IPR026992: Non-haem dioxygenase N-terminal domain; IPR027443: Isopenicillin N synthase-like	GO:0016491 MF: oxidoreductase activity;GO:0055114 BP: oxidation-reduction process	G	PF14226; PF03171	IPR005123; IPR026992; IPR027443	GO:0016491; GO:0055114
42	TraesCS2B01G430400LC	TraesCS2B01G430400LC.1	1	*-*	tr|A0A1D1ZCU0|A0A1D1ZCU0_9ARAE	Retrovirus-related Pol polyprotein from transposon TNT 1-94	PF14223: gag-polypeptide of LTR copia-type; PF00098: Zinc knuckle	IPR001878: Zinc finger, CCHC-type	GO:0003676 MF: nucleic acid binding;GO:0008270 MF: zinc ion binding	TE	PF14223; PF00098	IPR001878	GO:0003676; GO:0008270
43	TraesCS2B01G470400LC	TraesCS2B01G470400LC.1	1	*-*	sp|P34788|RS18_ARATH	40S ribosomal protein S18	PF14111: Domain of unknown function (DUF4283); PF14392: Zinc knuckle; PF13456: Reverse transcriptase-like	IPR012337: Ribonuclease H-like domain; IPR025558: Domain of unknown function DUF4283; IPR025836: Zinc knuckle CX2CX4HX4C	GO:0003676 MF: nucleic acid binding	TE?	PF14111; PF14392; PF13456	IPR012337; IPR025558; IPR025836	GO:0003676
44	TraesCS2B01G519100	TraesCS2B01G519100.1	1	***	tr|A0A1E5VYJ5|A0A1E5VYJ5_9POAL	Agmatine coumaroyltransferase-2	PF02458: Transferase family	IPR003480: Transferase	GO:0016747 MF: transferase activity, transferring acyl groups other than amino-acyl groups	G	PF02458	IPR003480	GO:0016747
45	TraesCS2B01G578600	TraesCS2B01G578600.1	1	*-*	tr|M8C4B1|M8C4B1_AEGTA	rRNA 2'-O-methyltransferase fibrillarin 2	PF01269: Fibrillarin	IPR000692: Fibrillarin; IPR020813: Fibrillarin, conserved site; IPR029063: S-adenosyl-L-methionine-dependent methyltransferase	GO:0003723 MF: RNA binding;GO:0006364 BP: rRNA processing;GO:0008033 BP: tRNA processing;GO:0008168 MF: methyltransferase activity	G	PF01269	IPR000692; IPR020813; IPR029063	GO:0003723; GO:0006364; GO:0008033; GO:0008168
46	TraesCS2B01G596300LC	TraesCS2B01G596300LC.1	1	***	tr|E7CWB5|E7CWB5_WHEAT	Lectin receptor kinase	PF00139: Legume lectin domain; PF00069: Protein kinase domain	IPR000719: Protein kinase domain; IPR001220: Legume lectin domain; IPR008271: Serine/threonine-protein kinase, active site; IPR011009: Protein kinase-like domain; IPR013320: Concanavalin A-like lectin/glucanase domain; IPR017441: Protein kinase, ATP binding site	GO:0004672 MF: protein kinase activity;GO:0005524 MF: ATP binding;GO:0006468 BP: protein phosphorylation;GO:0030246 MF: carbohydrate binding	G	PF00139; PF00069	IPR000719; IPR001220; IPR008271; IPR011009; IPR013320; IPR017441	GO:0004672; GO:0005524; GO:0006468; GO:0030246
47	TraesCS2B01G607700LC	TraesCS2B01G607700LC.1	1	--*	sp|Q6QN12|IOD2_PIG	Type II iodothyronine deiodinase				G
48	TraesCS2B01G753700LC	TraesCS2B01G753700LC.1	1	***	tr|A0A0K9PIJ0|A0A0K9PIJ0_ZOSMR	SAUR-like auxin-responsive protein family	PF02519: Auxin responsive protein	IPR003676: Small auxin-up RNA	GO:0009733 BP: response to auxin	G	PF02519	IPR003676	GO:0009733
49	TraesCS2B01G789400LC	TraesCS2B01G789400LC.1	1	--*	AT5G10170.1	myo-inositol-1-phosphate synthase 3				G
50	TraesCS2D01G168800	TraesCS2D01G168800.1	1	*-*	AT5G63930.1	Leucine-rich repeat protein kinase family protein		IPR032675: Leucine-rich repeat domain, L domain-like		G		IPR032675
51	TraesCS2D01G172500	TraesCS2D01G172500.1	1	--*	tr|A0A199VXY3|A0A199VXY3_ANACO	Purple acid phosphatase	PF00149: Calcineurin-like phosphoesterase	IPR004843: Calcineurin-like phosphoesterase domain, ApaH type; IPR011230: Phosphoesterase At2g46880; IPR029052: Metallo-dependent phosphatase-like	GO:0016787 MF: hydrolase activity	G	PF00149	IPR004843; IPR011230; IPR029052	GO:0016787
52	TraesCS2D01G177100	TraesCS2D01G177100.1	1	***	tr|D7LBV7|D7LBV7_ARALL	SPX domain-containing protein	PF03105: SPX domain	IPR004331: SPX domain		G	PF03105	IPR004331
53	TraesCS2D01G187700	TraesCS2D01G187700.1	1	***	tr|A0A151SW58|A0A151SW58_CAJCA	IgA FC receptor				G
54	TraesCS2D01G187800	TraesCS2D01G187800.1	1	***	tr|A0A1J3EIS4|A0A1J3EIS4_NOCCA	IgA FC receptor				G
55	TraesCS2D01G193300	TraesCS2D01G193300.1	1	***	tr|C0PHC4|C0PHC4_MAIZE	GRAS transcription factor	PF03514: GRAS domain family	IPR005202: Transcription factor GRAS		G	PF03514	IPR005202
56	TraesCS2D01G223600LC	TraesCS2D01G223600LC.1	1	***	tr|A0A0A9IDI5|A0A0A9IDI5_ARUDO	IDP372				G
57	TraesCS2D01G252400	TraesCS2D01G252400.1	1	***	tr|A0A0K9P6N2|A0A0K9P6N2_ZOSMR	Transporter	PF00083: Sugar (and other) transporter	IPR003663: Sugar/inositol transporter; IPR005828: Major facilitator, sugar transporter-like; IPR005829: Sugar transporter, conserved site; IPR020846: Major facilitator superfamily domain	GO:0005215 MF: transporter activity;GO:0016020 CC: membrane;GO:0016021 CC: integral component of membrane;GO:0022857 MF: transmembrane transporter activity;GO:0022891 MF: substrate-specific transmembrane transporter activity;GO:0055085 BP: transmembrane transport	G	PF00083	IPR003663; IPR005828; IPR005829; IPR020846	GO:0005215; GO:0016020; GO:0016021; GO:0022857; GO:0022891; GO:0055085
58	TraesCS2D01G289100LC	TraesCS2D01G289100LC.2	1	--*	tr|A0A0B2QFX9|A0A0B2QFX9_GLYSO	Serine/threonine-protein kinase				G
59	TraesCS2D01G289100LC	TraesCS2D01G289100LC.1	0	--*	tr|A0A0B2QFX9|A0A0B2QFX9_GLYSO	Serine/threonine-protein kinase				G
60	TraesCS2D01G310100LC	TraesCS2D01G310100LC.1	1	--*	AT4G30650.1	Low temperature and salt responsive protein family				G
61	TraesCS2D01G345900LC	TraesCS2D01G345900LC.1	1	--*	sp|P0CP10|NAR1_CRYNJ	Cytosolic Fe-S cluster assembly factor NAR1				G
62	TraesCS2D01G392800	TraesCS2D01G392800.1	1	***	tr|A0A061G1L6|A0A061G1L6_THECC	2-oxoglutarate (2OG) and Fe(II)-dependent oxygenase superfamily protein	PF14226: non-haem dioxygenase in morphine synthesis N-terminal; PF03171: 2OG-Fe(II) oxygenase superfamily	IPR005123: Oxoglutarate/iron-dependent dioxygenase; IPR026992: Non-haem dioxygenase N-terminal domain; IPR027443: Isopenicillin N synthase-like	GO:0016491 MF: oxidoreductase activity;GO:0055114 BP: oxidation-reduction process	G	PF14226; PF03171	IPR005123; IPR026992; IPR027443	GO:0016491; GO:0055114
63	TraesCS2D01G408700	TraesCS2D01G408700.1	1	***	tr|B9R9S6|B9R9S6_RICCO	Glycerol-3-phosphate transporter, putative	PF07690: Major Facilitator Superfamily	IPR000849: Sugar phosphate transporter; IPR011701: Major facilitator superfamily; IPR020846: Major facilitator superfamily domain	GO:0005215 MF: transporter activity;GO:0006810 BP: transport;GO:0016021 CC: integral component of membrane;GO:0055085 BP: transmembrane transport	G	PF07690	IPR000849; IPR011701; IPR020846	GO:0005215; GO:0006810; GO:0016021; GO:0055085
64	TraesCS2D01G481700	TraesCS2D01G481700.1	1	***	tr|M7YTJ6|M7YTJ6_TRIUA	Anthocyanidin reductase	PF01370: NAD dependent epimerase/dehydratase family	IPR001509: NAD-dependent epimerase/dehydratase; IPR016040: NAD(P)-binding domain	GO:0003824 MF: catalytic activity;GO:0050662 MF: coenzyme binding	G	PF01370	IPR001509; IPR016040	GO:0003824; GO:0050662
65	TraesCS2D01G596300	TraesCS2D01G596300.1	1	***	AT2G35460.1	Late embryogenesis abundant (LEA) hydroxyproline-rich glycoprotein family	PF03168: Late embryogenesis abundant protein	IPR004864: Late embryogenesis abundant protein, LEA-14; IPR013783: Immunoglobulin-like fold		G	PF03168	IPR004864; IPR013783
66	TraesCS2D01G596400	TraesCS2D01G596400.1	1	***	tr|A0A061F1P4|A0A061F1P4_THECC	Late embryogenesis abundant (LEA) hydroxyproline-rich glycoprotein family, putative	PF03168: Late embryogenesis abundant protein	IPR004864: Late embryogenesis abundant protein, LEA-14; IPR013783: Immunoglobulin-like fold		G	PF03168	IPR004864; IPR013783
67	TraesCS2D01G727100LC	TraesCS2D01G727100LC.1	1	--*	AT1G72250.4	Di-glucose binding protein with Kinesin motor domain-containing protein				G
68	TraesCS3A01G129000	TraesCS3A01G129000.1	1	***	tr|A0A077RXF4|A0A077RXF4_WHEAT	ABC subfamily C transporter	PF00664: ABC transporter transmembrane region; PF00005: ABC transporter	IPR003439: ABC transporter-like; IPR003593: AAA+ ATPase domain; IPR011527: ABC transporter type 1, transmembrane domain; IPR017871: ABC transporter, conserved site; IPR027417: P-loop containing nucleoside triphosphate hydrolase	GO:0005524 MF: ATP binding;GO:0006810 BP: transport;GO:0016021 CC: integral component of membrane;GO:0016887 MF: ATPase activity;GO:0042626 MF: ATPase activity, coupled to transmembrane movement of substances;GO:0055085 BP: transmembrane transport	G	PF00664; PF00005	IPR003439; IPR003593; IPR011527; IPR017871; IPR027417	GO:0005524; GO:0006810; GO:0016021; GO:0016887; GO:0042626; GO:0055085
69	TraesCS3A01G144900	TraesCS3A01G144900.2	0	--*	tr|W9RY25|W9RY25_9ROSA	Subtilisin-like protease	PF05922: Peptidase inhibitor I9	IPR010259: Peptidase S8 propeptide/proteinase inhibitor I9		G	PF05922	IPR010259
70	TraesCS3A01G144900	TraesCS3A01G144900.1	1	--*	tr|A0A151SXX3|A0A151SXX3_CAJCA	Subtilisin-like protease				G
71	TraesCS3A01G165400LC	TraesCS3A01G165400LC.1	1	--*	AT2G47900.3	tubby like protein 3				G
72	TraesCS3A01G180200	TraesCS3A01G180200.1	1	***	tr|A0A1D5VJ28|A0A1D5VJ28_WHEAT	Peroxidase	PF00141: Peroxidase	IPR000823: Plant peroxidase; IPR002016: Haem peroxidase, plant/fungal/bacterial; IPR010255: Haem peroxidase; IPR019793: Peroxidases heam-ligand binding site; IPR019794: Peroxidase, active site	GO:0004601 MF: peroxidase activity;GO:0006979 BP: response to oxidative stress;GO:0020037 MF: heme binding;GO:0055114 BP: oxidation-reduction process	G	PF00141	IPR000823; IPR002016; IPR010255; IPR019793; IPR019794	GO:0004601; GO:0006979; GO:0020037; GO:0055114
73	TraesCS3A01G201700	TraesCS3A01G201700.1	1	--*	sp|A1R516|IF2_ARTAT	Translation initiation factor IF-2				G
74	TraesCS3A01G217800	TraesCS3A01G217800.1	1	*-*	tr|G7K0V8|G7K0V8_MEDTR	Receptor-like kinase	PF08263: Leucine rich repeat N-terminal domain; PF13855: Leucine rich repeat; PF00069: Protein kinase domain	IPR000719: Protein kinase domain; IPR001611: Leucine-rich repeat; IPR011009: Protein kinase-like domain; IPR013210: Leucine-rich repeat-containing N-terminal, plant-type; IPR032675: Leucine-rich repeat domain, L domain-like	GO:0004672 MF: protein kinase activity;GO:0005515 MF: protein binding;GO:0005524 MF: ATP binding;GO:0006468 BP: protein phosphorylation	G	PF08263; PF13855; PF00069	IPR000719; IPR001611; IPR011009; IPR013210; IPR032675	GO:0004672; GO:0005515; GO:0005524; GO:0006468
75	TraesCS3A01G218000	TraesCS3A01G218000.2	0	***	tr|W0TUG3|W0TUG3_ACAMN	Pleiotropic drug resistance ABC transporter	PF01061: ABC-2 type transporter; PF08370: Plant PDR ABC transporter associated; PF00005: ABC transporter	IPR003439: ABC transporter-like; IPR003593: AAA+ ATPase domain; IPR013525: ABC-2 type transporter; IPR013581: Plant PDR ABC transporter associated; IPR027417: P-loop containing nucleoside triphosphate hydrolase	GO:0005524 MF: ATP binding;GO:0016020 CC: membrane;GO:0016887 MF: ATPase activity	G	PF01061; PF08370; PF00005	IPR003439; IPR003593; IPR013525; IPR013581; IPR027417	GO:0005524; GO:0016020; GO:0016887
76	TraesCS3A01G218000	TraesCS3A01G218000.3	0	***	tr|W0TUG3|W0TUG3_ACAMN	Pleiotropic drug resistance ABC transporter	PF01061: ABC-2 type transporter; PF08370: Plant PDR ABC transporter associated; PF00005: ABC transporter	IPR003439: ABC transporter-like; IPR003593: AAA+ ATPase domain; IPR013525: ABC-2 type transporter; IPR013581: Plant PDR ABC transporter associated; IPR027417: P-loop containing nucleoside triphosphate hydrolase	GO:0005524 MF: ATP binding;GO:0016020 CC: membrane;GO:0016887 MF: ATPase activity	G	PF01061; PF08370; PF00005	IPR003439; IPR003593; IPR013525; IPR013581; IPR027417	GO:0005524; GO:0016020; GO:0016887
77	TraesCS3A01G218000	TraesCS3A01G218000.1	1	***	tr|W0TUG3|W0TUG3_ACAMN	Pleiotropic drug resistance ABC transporter	PF14510: ABC-transporter extracellular N-terminal; PF00005: ABC transporter; PF01061: ABC-2 type transporter; PF08370: Plant PDR ABC transporter associated	IPR003439: ABC transporter-like; IPR003593: AAA+ ATPase domain; IPR013525: ABC-2 type transporter; IPR013581: Plant PDR ABC transporter associated; IPR027417: P-loop containing nucleoside triphosphate hydrolase; IPR029481: ABC-transporter extracellular N-terminal domain	GO:0005524 MF: ATP binding;GO:0016020 CC: membrane;GO:0016887 MF: ATPase activity	G	PF14510; PF00005; PF01061; PF08370	IPR003439; IPR003593; IPR013525; IPR013581; IPR027417; IPR029481	GO:0005524; GO:0016020; GO:0016887
78	TraesCS3A01G287500	TraesCS3A01G287500.1	1	***	tr|A0A1E5VT98|A0A1E5VT98_9POAL	Inorganic pyrophosphatase 2	PF06888: Putative Phosphatase	IPR006384: Pyridoxal phosphate phosphatase-related; IPR016965: Phosphatase PHOSPHO-type; IPR023214: HAD-like domain	GO:0016791 MF: phosphatase activity	G	PF06888	IPR006384; IPR016965; IPR023214	GO:0016791
79	TraesCS3A01G297200LC	TraesCS3A01G297200LC.1	1	--*	sp|Q5PCT5|HNS_SALPA	DNA-binding protein H-NS				G
80	TraesCS3A01G324100	TraesCS3A01G324100.1	1	***	tr|B9SG28|B9SG28_RICCO	Indole-3-acetic acid-amido synthetase GH3.3, putative	PF03321: GH3 auxin-responsive promoter	IPR004993: GH3 family		G	PF03321	IPR004993
81	TraesCS3A01G345500LC	TraesCS3A01G345500LC.1	1	--*	AT5G27550.2	P-loop containing nucleoside triphosphate hydrolases superfamily protein				G
82	TraesCS3A01G345500LC	TraesCS3A01G345500LC.2	0	--*	AT3G30340.1	nodulin MtN21 /EamA-like transporter family protein				G
83	TraesCS3A01G370300LC	TraesCS3A01G370300LC.1	1	--*	sp|Q3JES4|RUVA_NITOC	Holliday junction ATP-dependent DNA helicase RuvA				TE?
84	TraesCS3A01G434400	TraesCS3A01G434400.1	1	***	tr|A0A059Q0S2|A0A059Q0S2_9POAL	MADS-box transcription factor	PF00319: SRF-type transcription factor (DNA-binding and dimerisation domain)	IPR002100: Transcription factor, MADS-box	GO:0003677 MF: DNA binding;GO:0046983 MF: protein dimerization activity	G	PF00319	IPR002100	GO:0003677; GO:0046983
85	TraesCS3B01G171700	TraesCS3B01G171700.1	1	--*	tr|W9RY25|W9RY25_9ROSA	Subtilisin-like protease	PF05922: Peptidase inhibitor I9	IPR010259: Peptidase S8 propeptide/proteinase inhibitor I9		G	PF05922	IPR010259
86	TraesCS3B01G180200LC	TraesCS3B01G180200LC.1	1	--*	tr|A5HVC8|A5HVC8_9POAL	Transposase				TE
87	TraesCS3B01G193600	TraesCS3B01G193600.1	1	--*	sp|A1JKT8|MEND_YERE8	2-succinyl-5-enolpyruvyl-6-hydroxy-3-cyclohexene-1-carboxylate synthase	PF07762: Protein of unknown function (DUF1618)	IPR011676: Domain of unknown function DUF1618		G	PF07762	IPR011676
88	TraesCS3B01G198500	TraesCS3B01G198500.1	1	***	tr|A0A061F375|A0A061F375_THECC	DNA binding protein, putative		IPR011991: Winged helix-turn-helix DNA-binding domain		G		IPR011991
89	TraesCS3B01G209700	TraesCS3B01G209700.1	1	***	tr|W5D5A5|W5D5A5_WHEAT	Peroxidase	PF00141: Peroxidase	IPR000823: Plant peroxidase; IPR002016: Haem peroxidase, plant/fungal/bacterial; IPR010255: Haem peroxidase; IPR019793: Peroxidases heam-ligand binding site; IPR019794: Peroxidase, active site	GO:0004601 MF: peroxidase activity;GO:0006979 BP: response to oxidative stress;GO:0020037 MF: heme binding;GO:0055114 BP: oxidation-reduction process	G	PF00141	IPR000823; IPR002016; IPR010255; IPR019793; IPR019794	GO:0004601; GO:0006979; GO:0020037; GO:0055114
90	TraesCS3B01G209900	TraesCS3B01G209900.1	1	***	tr|A0A077RRC4|A0A077RRC4_WHEAT	Peroxidase	PF00141: Peroxidase	IPR000823: Plant peroxidase; IPR002016: Haem peroxidase, plant/fungal/bacterial; IPR010255: Haem peroxidase; IPR019793: Peroxidases heam-ligand binding site; IPR019794: Peroxidase, active site	GO:0004601 MF: peroxidase activity;GO:0006979 BP: response to oxidative stress;GO:0020037 MF: heme binding;GO:0055114 BP: oxidation-reduction process	G	PF00141	IPR000823; IPR002016; IPR010255; IPR019793; IPR019794	GO:0004601; GO:0006979; GO:0020037; GO:0055114
91	TraesCS3B01G227500	TraesCS3B01G227500.1	1	*-*	tr|N1QVK3|N1QVK3_AEGTA	Glutelin type-A 2				G
92	TraesCS3B01G248500	TraesCS3B01G248500.1	1	***	tr|W0TUG3|W0TUG3_ACAMN	Pleiotropic drug resistance ABC transporter	PF14510: ABC-transporter extracellular N-terminal; PF00005: ABC transporter; PF01061: ABC-2 type transporter; PF08370: Plant PDR ABC transporter associated	IPR003439: ABC transporter-like; IPR003593: AAA+ ATPase domain; IPR013525: ABC-2 type transporter; IPR013581: Plant PDR ABC transporter associated; IPR027417: P-loop containing nucleoside triphosphate hydrolase; IPR029481: ABC-transporter extracellular N-terminal domain	GO:0005524 MF: ATP binding;GO:0016020 CC: membrane;GO:0016887 MF: ATPase activity	G	PF14510; PF00005; PF01061; PF08370	IPR003439; IPR003593; IPR013525; IPR013581; IPR027417; IPR029481	GO:0005524; GO:0016020; GO:0016887
93	TraesCS3B01G282700	TraesCS3B01G282700.1	1	***	AT5G19860.1	transmembrane protein, putative (Protein of unknown function, DUF538)	PF04398: Protein of unknown function, DUF538	IPR007493: Protein of unknown function DUF538		U	PF04398	IPR007493
94	TraesCS3B01G322000	TraesCS3B01G322000.1	1	***	tr|A0A1E5VT98|A0A1E5VT98_9POAL	Inorganic pyrophosphatase 2	PF06888: Putative Phosphatase	IPR006384: Pyridoxal phosphate phosphatase-related; IPR016965: Phosphatase PHOSPHO-type; IPR023214: HAD-like domain	GO:0016791 MF: phosphatase activity	G	PF06888	IPR006384; IPR016965; IPR023214	GO:0016791
95	TraesCS3B01G370300	TraesCS3B01G370300.1	1	***	tr|B6T3E4|B6T3E4_MAIZE	Glycerophosphodiester phosphodiesterase	PF03009: Glycerophosphoryl diester phosphodiesterase family	IPR017946: PLC-like phosphodiesterase, TIM beta/alpha-barrel domain; IPR030395: Glycerophosphodiester phosphodiesterase domain	GO:0006629 BP: lipid metabolic process;GO:0008081 MF: phosphoric diester hydrolase activity	G	PF03009	IPR017946; IPR030395	GO:0006629; GO:0008081
96	TraesCS3D01G008900	TraesCS3D01G008900.1	1	***	AT4G20970.1	basic helix-loop-helix (bHLH) DNA-binding superfamily protein		IPR011598: Myc-type, basic helix-loop-helix (bHLH) domain	GO:0046983 MF: protein dimerization activity	G		IPR011598	GO:0046983
97	TraesCS3D01G153700	TraesCS3D01G153700.1	1	--*	tr|W9RY25|W9RY25_9ROSA	Subtilisin-like protease	PF05922: Peptidase inhibitor I9	IPR010259: Peptidase S8 propeptide/proteinase inhibitor I9		G	PF05922	IPR010259
98	TraesCS3D01G184900	TraesCS3D01G184900.1	1	***	tr|A0A1D5WU42|A0A1D5WU42_WHEAT	Peroxidase	PF00141: Peroxidase	IPR000823: Plant peroxidase; IPR002016: Haem peroxidase, plant/fungal/bacterial; IPR010255: Haem peroxidase; IPR019793: Peroxidases heam-ligand binding site; IPR019794: Peroxidase, active site	GO:0004601 MF: peroxidase activity;GO:0006979 BP: response to oxidative stress;GO:0020037 MF: heme binding;GO:0055114 BP: oxidation-reduction process	G	PF00141	IPR000823; IPR002016; IPR010255; IPR019793; IPR019794	GO:0004601; GO:0006979; GO:0020037; GO:0055114
99	TraesCS3D01G185000	TraesCS3D01G185000.1	1	***	tr|M8CIJ6|M8CIJ6_AEGTA	Peroxidase	PF00141: Peroxidase	IPR000823: Plant peroxidase; IPR002016: Haem peroxidase, plant/fungal/bacterial; IPR010255: Haem peroxidase; IPR019793: Peroxidases heam-ligand binding site; IPR019794: Peroxidase, active site	GO:0004601 MF: peroxidase activity;GO:0006979 BP: response to oxidative stress;GO:0020037 MF: heme binding;GO:0055114 BP: oxidation-reduction process	G	PF00141	IPR000823; IPR002016; IPR010255; IPR019793; IPR019794	GO:0004601; GO:0006979; GO:0020037; GO:0055114
100	TraesCS3D01G185100	TraesCS3D01G185100.1	1	***	tr|A0A1D5WSQ1|A0A1D5WSQ1_WHEAT	Peroxidase	PF00141: Peroxidase	IPR000823: Plant peroxidase; IPR002016: Haem peroxidase, plant/fungal/bacterial; IPR010255: Haem peroxidase; IPR019793: Peroxidases heam-ligand binding site; IPR019794: Peroxidase, active site	GO:0004601 MF: peroxidase activity;GO:0006979 BP: response to oxidative stress;GO:0020037 MF: heme binding;GO:0055114 BP: oxidation-reduction process	G	PF00141	IPR000823; IPR002016; IPR010255; IPR019793; IPR019794	GO:0004601; GO:0006979; GO:0020037; GO:0055114
101	TraesCS3D01G185200	TraesCS3D01G185200.1	1	***	tr|A0A1D5WSQ2|A0A1D5WSQ2_WHEAT	Peroxidase	PF00141: Peroxidase	IPR000823: Plant peroxidase; IPR002016: Haem peroxidase, plant/fungal/bacterial; IPR010255: Haem peroxidase; IPR019793: Peroxidases heam-ligand binding site; IPR019794: Peroxidase, active site	GO:0004601 MF: peroxidase activity;GO:0006979 BP: response to oxidative stress;GO:0020037 MF: heme binding;GO:0055114 BP: oxidation-reduction process	G	PF00141	IPR000823; IPR002016; IPR010255; IPR019793; IPR019794	GO:0004601; GO:0006979; GO:0020037; GO:0055114
102	TraesCS3D01G262300	TraesCS3D01G262300.2	1	***	AT5G38210.2	Protein kinase family protein	PF14380: Wall-associated receptor kinase C-terminal; PF00069: Protein kinase domain	IPR000719: Protein kinase domain; IPR008271: Serine/threonine-protein kinase, active site; IPR011009: Protein kinase-like domain; IPR017441: Protein kinase, ATP binding site; IPR032872: Wall-associated receptor kinase, C-terminal	GO:0004672 MF: protein kinase activity;GO:0005524 MF: ATP binding;GO:0006468 BP: protein phosphorylation	G	PF14380; PF00069	IPR000719; IPR008271; IPR011009; IPR017441; IPR032872	GO:0004672; GO:0005524; GO:0006468
103	TraesCS3D01G262300	TraesCS3D01G262300.1	0	***	AT1G66940.1	kinase-like protein	PF13947: Wall-associated receptor kinase galacturonan-binding; PF14380: Wall-associated receptor kinase C-terminal	IPR025287: Wall-associated receptor kinase, galacturonan-binding domain; IPR032872: Wall-associated receptor kinase, C-terminal	GO:0030247 MF: polysaccharide binding	G	PF13947; PF14380	IPR025287; IPR032872	GO:0030247
104	TraesCS3D01G287300	TraesCS3D01G287300.1	1	***	tr|A0A1E5VT98|A0A1E5VT98_9POAL	Inorganic pyrophosphatase 2	PF06888: Putative Phosphatase	IPR006384: Pyridoxal phosphate phosphatase-related; IPR016965: Phosphatase PHOSPHO-type; IPR023214: HAD-like domain	GO:0016791 MF: phosphatase activity	G	PF06888	IPR006384; IPR016965; IPR023214	GO:0016791
105	TraesCS3D01G316400LC	TraesCS3D01G316400LC.1	1	--*	sp|O74760|EIF3A_SCHPO	Eukaryotic translation initiation factor 3 subunit A				G
106	TraesCS3D01G352300LC	TraesCS3D01G352300LC.1	1	--*	sp|Q4WEL6|SLX1_ASPFU	Structure-specific endonuclease subunit slx1				G
107	TraesCS3D01G427700	TraesCS3D01G427700.1	1	***	tr|A0A059Q0S2|A0A059Q0S2_9POAL	MADS-box transcription factor	PF00319: SRF-type transcription factor (DNA-binding and dimerisation domain)	IPR002100: Transcription factor, MADS-box	GO:0003677 MF: DNA binding;GO:0046983 MF: protein dimerization activity	G	PF00319	IPR002100	GO:0003677; GO:0046983
108	TraesCS3D01G432000	TraesCS3D01G432000.1	1	***	tr|D7MQB8|D7MQB8_ARALL	Kinase family protein	PF00069: Protein kinase domain	IPR000719: Protein kinase domain; IPR008271: Serine/threonine-protein kinase, active site; IPR011009: Protein kinase-like domain; IPR017441: Protein kinase, ATP binding site	GO:0004672 MF: protein kinase activity;GO:0005524 MF: ATP binding;GO:0006468 BP: protein phosphorylation	G	PF00069	IPR000719; IPR008271; IPR011009; IPR017441	GO:0004672; GO:0005524; GO:0006468
109	TraesCS3D01G638900LC	TraesCS3D01G638900LC.1	1	--*	AT2G26210.7	Ankyrin repeat family protein				G
110	TraesCS4A01G200000	TraesCS4A01G200000.1	1	***	tr|A0A096UQJ4|A0A096UQJ4_WHEAT	Non-specific serine/threonine protein kinase	PF00069: Protein kinase domain; PF03822: NAF domain	IPR000719: Protein kinase domain; IPR004041: NAF domain; IPR008271: Serine/threonine-protein kinase, active site; IPR011009: Protein kinase-like domain; IPR017441: Protein kinase, ATP binding site; IPR018451: NAF/FISL domain	GO:0004672 MF: protein kinase activity;GO:0005524 MF: ATP binding;GO:0006468 BP: protein phosphorylation;GO:0007165 BP: signal transduction	G	PF00069; PF03822	IPR000719; IPR004041; IPR008271; IPR011009; IPR017441; IPR018451	GO:0004672; GO:0005524; GO:0006468; GO:0007165
111	TraesCS4A01G279500	TraesCS4A01G279500.1	1	***	AT1G55265.1	DUF538 family protein, putative (Protein of unknown function, DUF538)	PF04398: Protein of unknown function, DUF538	IPR007493: Protein of unknown function DUF538		U	PF04398	IPR007493
112	TraesCS4A01G423800	TraesCS4A01G423800.1	1	***	tr|K7VSQ3|K7VSQ3_MAIZE	Histone H3	PF00125: Core histone H2A/H2B/H3/H4	IPR000164: Histone H3/CENP-A; IPR007125: Histone H2A/H2B/H3; IPR009072: Histone-fold	GO:0000786 CC: nucleosome;GO:0003677 MF: DNA binding;GO:0046982 MF: protein heterodimerization activity	G	PF00125	IPR000164; IPR007125; IPR009072	GO:0000786; GO:0003677; GO:0046982
113	TraesCS4B01G195500	TraesCS4B01G195500.1	1	*-*	tr|A0A0E0JHQ6|A0A0E0JHQ6_ORYPU	Dihydrolipoamide acetyltransferase component of pyruvate dehydrogenase complex	PF12274: Protein of unknown function (DUF3615)	IPR022059: Protein of unknown function DUF3615		G	PF12274	IPR022059
114	TraesCS4B01G234300LC	TraesCS4B01G234300LC.1	1	--*	sp|Q6HAN0|META_BACHK	Homoserine O-succinyltransferase				G
115	TraesCS4B01G256200LC	TraesCS4B01G256200LC.1	1	--*	tr|A0A164ZHF4|A0A164ZHF4_DAUCA	DNA-(apurinic or apyrimidinic site) lyase		IPR005135: Endonuclease/exonuclease/phosphatase		TE?		IPR005135
116	TraesCS4B01G354700LC	TraesCS4B01G354700LC.1	1	--*	sp|Q8NUI7|ICAA_STAAW	Poly-beta-1,6-N-acetyl-D-glucosamine synthase				G
117	TraesCS4B01G486900LC	TraesCS4B01G486900LC.1	1	--*	AT3G53090.2	ubiquitin-protein ligase 7				G
118	TraesCS4D01G031400	TraesCS4D01G031400.1	1	***	AT5G19860.1	transmembrane protein, putative (Protein of unknown function, DUF538)	PF04398: Protein of unknown function, DUF538	IPR007493: Protein of unknown function DUF538		U	PF04398	IPR007493
119	TraesCS4D01G117200	TraesCS4D01G117200.1	1	***	AT1G67390.1	F-box family protein	PF00646: F-box domain; PF08387: FBD	IPR001810: F-box domain; IPR006566: FBD domain; IPR032675: Leucine-rich repeat domain, L domain-like	GO:0005515 MF: protein binding	TE?	PF00646; PF08387	IPR001810; IPR006566; IPR032675	GO:0005515
120	TraesCS4D01G314100	TraesCS4D01G314100.1	1	--*	AT4G32850.9	nuclear poly(a) polymerase				G
121	TraesCS4D01G361700	TraesCS4D01G361700.1	1	***	tr|Q14F61|Q14F61_WHEAT	Expansin protein	PF03330: Lytic transglycolase; PF01357: Pollen allergen	IPR005795: Major pollen allergen Lol pI; IPR007112: Expansin/pollen allergen, DPBB domain; IPR007117: Expansin, cellulose-binding-like domain; IPR007118: Expansin/Lol pI; IPR009009: RlpA-like protein, double-psi beta-barrel domain	GO:0005576 CC: extracellular region;GO:0019953 BP: sexual reproduction	G	PF03330; PF01357	IPR005795; IPR007112; IPR007117; IPR007118; IPR009009	GO:0005576; GO:0019953
122	TraesCS5A01G043800	TraesCS5A01G043800.1	1	***	tr|A0A1D5YUZ0|A0A1D5YUZ0_WHEAT	Pectinesterase	PF04043: Plant invertase/pectin methylesterase inhibitor; PF01095: Pectinesterase	IPR000070: Pectinesterase, catalytic; IPR006501: Pectinesterase inhibitor domain; IPR011050: Pectin lyase fold/virulence factor; IPR012334: Pectin lyase fold; IPR033131: Pectinesterase, Asp active site	GO:0004857 MF: enzyme inhibitor activity;GO:0005618 CC: cell wall;GO:0030599 MF: pectinesterase activity;GO:0042545 BP: cell wall modification	G	PF04043; PF01095	IPR000070; IPR006501; IPR011050; IPR012334; IPR033131	GO:0004857; GO:0005618; GO:0030599; GO:0042545
123	TraesCS5A01G268400LC	TraesCS5A01G268400LC.1	1	--*	AT3G02930.3	weak chloroplast movement under blue light protein (DUF827)				G
124	TraesCS5A01G281400LC	TraesCS5A01G281400LC.1	1	--*	AT4G29100.2	basic helix-loop-helix (bHLH) DNA-binding superfamily protein				G
125	TraesCS5A01G328400LC	TraesCS5A01G328400LC.1	1	--*	AT5G51630.6	Disease resistance protein (TIR-NBS-LRR class) family				G
126	TraesCS5A01G348500	TraesCS5A01G348500.1	1	***	tr|K7VQC2|K7VQC2_MAIZE	Histone H4	PF15511: Centromere kinetochore component CENP-T histone fold	IPR001951: Histone H4; IPR009072: Histone-fold; IPR019809: Histone H4, conserved site	GO:0000786 CC: nucleosome;GO:0003677 MF: DNA binding;GO:0005634 CC: nucleus;GO:0006334 BP: nucleosome assembly;GO:0046982 MF: protein heterodimerization activity	G	PF15511	IPR001951; IPR009072; IPR019809	GO:0000786; GO:0003677; GO:0005634; GO:0006334; GO:0046982
127	TraesCS5A01G367300LC	TraesCS5A01G367300LC.1	1	***	tr|A0A151R5A6|A0A151R5A6_CAJCA	Protein FAR1-RELATED SEQUENCE 5	PF03101: FAR1 DNA-binding domain; PF10551: MULE transposase domain	IPR004330: FAR1 DNA binding domain; IPR018289: MULE transposase domain		TE	PF03101; PF10551	IPR004330; IPR018289
128	TraesCS5A01G486800	TraesCS5A01G486800.1	1	***	tr|A0A164TMY6|A0A164TMY6_DAUCA	UDP-glycosyltransferase	PF00201: UDP-glucoronosyl and UDP-glucosyl transferase	IPR002213: UDP-glucuronosyl/UDP-glucosyltransferase	GO:0008152 BP: metabolic process;GO:0016758 MF: transferase activity, transferring hexosyl groups	G	PF00201	IPR002213	GO:0008152; GO:0016758
129	TraesCS5A01G545300LC	TraesCS5A01G545300LC.1	1	--*	AT3G13810.5	indeterminate(ID)-domain 11				G
130	TraesCS5B01G045400	TraesCS5B01G045400.1	1	***	tr|G7LAE6|G7LAE6_MEDTR	Fasciclin-like arabinogalactan protein		IPR000782: FAS1 domain		G		IPR000782
131	TraesCS5B01G160700	TraesCS5B01G160700.1	1	***	tr|Q4KUK8|Q4KUK8_WHEAT	Cinnamoyl-CoA reductase	PF01370: NAD dependent epimerase/dehydratase family	IPR001509: NAD-dependent epimerase/dehydratase; IPR016040: NAD(P)-binding domain	GO:0003824 MF: catalytic activity;GO:0050662 MF: coenzyme binding	G	PF01370	IPR001509; IPR016040	GO:0003824; GO:0050662
132	TraesCS5B01G279500LC	TraesCS5B01G279500LC.1	1	--*	sp|Q3BCR2|TPMT_PANTI	Thiopurine S-methyltransferase				G
133	TraesCS5B01G331000LC	TraesCS5B01G331000LC.1	1	--*	sp|O01510|SMG1_CAEEL	Serine/threonine-protein kinase smg-1				G
134	TraesCS5B01G483900LC	TraesCS5B01G483900LC.1	1	--*	sp|B4I3P3|EIF3A_DROSE	Eukaryotic translation initiation factor 3 subunit A				G
135	TraesCS5B01G499000	TraesCS5B01G499000.1	1	***	tr|A0A1D5ZPJ9|A0A1D5ZPJ9_WHEAT	DNA-directed RNA polymerase subunit	PF04997: RNA polymerase Rpb1, domain 1; PF00623: RNA polymerase Rpb1, domain 2; PF04983: RNA polymerase Rpb1, domain 3; PF05000: RNA polymerase Rpb1, domain 4; PF04998: RNA polymerase Rpb1, domain 5; PF04992: RNA polymerase Rpb1, domain 6; PF04990: RNA polymerase Rpb1, domain 7	IPR000684: RNA polymerase II, heptapeptide repeat, eukaryotic; IPR000722: RNA polymerase, alpha subunit; IPR006592: RNA polymerase, N-terminal; IPR007066: RNA polymerase Rpb1, domain 3; IPR007073: RNA polymerase Rpb1, domain 7; IPR007075: RNA polymerase Rpb1, domain 6; IPR007080: RNA polymerase Rpb1, domain 1; IPR007081: RNA polymerase Rpb1, domain 5; IPR007083: RNA polymerase Rpb1, domain 4	GO:0003677 MF: DNA binding;GO:0003899 MF: DNA-directed 5'-3' RNA polymerase activity;GO:0005665 CC: DNA-directed RNA polymerase II, core complex;GO:0006351 BP: transcription, DNA-templated;GO:0006366 BP: transcription from RNA polymerase II promoter	G	PF04997; PF00623; PF04983; PF05000; PF04998; PF04992; PF04990	IPR000684; IPR000722; IPR006592; IPR007066; IPR007073; IPR007075; IPR007080; IPR007081; IPR007083	GO:0003677; GO:0003899; GO:0005665; GO:0006351; GO:0006366
136	TraesCS5B01G500700	TraesCS5B01G500700.1	1	***	tr|A0A164TMY6|A0A164TMY6_DAUCA	UDP-glycosyltransferase	PF00201: UDP-glucoronosyl and UDP-glucosyl transferase	IPR002213: UDP-glucuronosyl/UDP-glucosyltransferase	GO:0008152 BP: metabolic process;GO:0016758 MF: transferase activity, transferring hexosyl groups	G	PF00201	IPR002213	GO:0008152; GO:0016758
137	TraesCS5B01G804500LC	TraesCS5B01G804500LC.1	1	*-*	tr|A0A151TAR7|A0A151TAR7_CAJCA	Retrovirus-related Pol polyprotein from transposon TNT 1-94	PF13976: GAG-pre-integrase domain	IPR025724: GAG-pre-integrase domain		TE	PF13976	IPR025724
138	TraesCS5D01G053200	TraesCS5D01G053200.1	1	***	tr|W5G2X3|W5G2X3_WHEAT	Pectinesterase	PF04043: Plant invertase/pectin methylesterase inhibitor; PF01095: Pectinesterase	IPR000070: Pectinesterase, catalytic; IPR006501: Pectinesterase inhibitor domain; IPR011050: Pectin lyase fold/virulence factor; IPR012334: Pectin lyase fold; IPR033131: Pectinesterase, Asp active site	GO:0004857 MF: enzyme inhibitor activity;GO:0005618 CC: cell wall;GO:0030599 MF: pectinesterase activity;GO:0042545 BP: cell wall modification	G	PF04043; PF01095	IPR000070; IPR006501; IPR011050; IPR012334; IPR033131	GO:0004857; GO:0005618; GO:0030599; GO:0042545
139	TraesCS5D01G121000LC	TraesCS5D01G121000LC.1	1	--*	tr|A0A1J3HH08|A0A1J3HH08_NOCCA	AP2-like ethylene-responsive transcription factor				G
140	TraesCS5D01G265200	TraesCS5D01G265200.1	1	*-*	sp|Q08298|RD22_ARATH	BURP domain protein RD22	PF03181: BURP domain	IPR004873: BURP domain		G	PF03181	IPR004873
141	TraesCS5D01G450600LC	TraesCS5D01G450600LC.1	1	*-*	tr|Q75GJ9|Q75GJ9_ORYSJ	Expressed protein (With alternative splicing), 5'-partial				G
142	TraesCS5D01G501000	TraesCS5D01G501000.1	1	***	tr|A0A164TMY6|A0A164TMY6_DAUCA	UDP-glycosyltransferase	PF00201: UDP-glucoronosyl and UDP-glucosyl transferase	IPR002213: UDP-glucuronosyl/UDP-glucosyltransferase	GO:0008152 BP: metabolic process;GO:0016758 MF: transferase activity, transferring hexosyl groups	G	PF00201	IPR002213	GO:0008152; GO:0016758
143	TraesCS6A01G036600	TraesCS6A01G036600.1	1	--*	AT1G78040.3	Pollen Ole e 1 allergen and extensin family protein				G
144	TraesCS6A01G045400LC	TraesCS6A01G045400LC.1	1	*-*	tr|B6T4H2|B6T4H2_MAIZE	F-box domain containing protein		IPR015915: Kelch-type beta propeller	GO:0005515 MF: protein binding	TE?		IPR015915	GO:0005515
145	TraesCS6A01G161600LC	TraesCS6A01G161600LC.1	1	--*	sp|Q04439|MYO5_YEAST	Myosin-5				G
146	TraesCS6A01G182100LC	TraesCS6A01G182100LC.1	1	*-*	AT1G16820.1	vacuolar ATP synthase catalytic subunit-related / V-ATPase-related / vacuolar proton pump-like protein				G
147	TraesCS6A01G210500	TraesCS6A01G210500.1	1	***	tr|W9S1D7|W9S1D7_9ROSA	Cytochrome P450	PF00067: Cytochrome P450	IPR001128: Cytochrome P450; IPR002401: Cytochrome P450, E-class, group I; IPR017972: Cytochrome P450, conserved site	GO:0005506 MF: iron ion binding;GO:0016705 MF: oxidoreductase activity, acting on paired donors, with incorporation or reduction of molecular oxygen;GO:0020037 MF: heme binding;GO:0055114 BP: oxidation-reduction process	G	PF00067	IPR001128; IPR002401; IPR017972	GO:0005506; GO:0016705; GO:0020037; GO:0055114
148	TraesCS6A01G222200LC	TraesCS6A01G222200LC.1	1	--*	tr|A0A1J3K8L6|A0A1J3K8L6_NOCCA	Decapping nuclease DXO-like protein, chloroplastic				G
149	TraesCS6A01G257300	TraesCS6A01G257300.3	0	***	tr|B9GW54|B9GW54_POPTR	SPX domain-containing family protein	PF03105: SPX domain; PF07690: Major Facilitator Superfamily	IPR004331: SPX domain; IPR011701: Major facilitator superfamily; IPR020846: Major facilitator superfamily domain	GO:0016021 CC: integral component of membrane;GO:0055085 BP: transmembrane transport	G	PF03105; PF07690	IPR004331; IPR011701; IPR020846	GO:0016021; GO:0055085
150	TraesCS6A01G257300	TraesCS6A01G257300.1	1	***	tr|B9GW54|B9GW54_POPTR	SPX domain-containing family protein	PF03105: SPX domain; PF07690: Major Facilitator Superfamily	IPR004331: SPX domain; IPR011701: Major facilitator superfamily; IPR020846: Major facilitator superfamily domain	GO:0016021 CC: integral component of membrane;GO:0055085 BP: transmembrane transport	G	PF03105; PF07690	IPR004331; IPR011701; IPR020846	GO:0016021; GO:0055085
151	TraesCS6A01G257300	TraesCS6A01G257300.2	0	***	tr|B9GW54|B9GW54_POPTR	SPX domain-containing family protein	PF03105: SPX domain; PF07690: Major Facilitator Superfamily	IPR004331: SPX domain; IPR011701: Major facilitator superfamily; IPR020846: Major facilitator superfamily domain	GO:0016021 CC: integral component of membrane;GO:0055085 BP: transmembrane transport	G	PF03105; PF07690	IPR004331; IPR011701; IPR020846	GO:0016021; GO:0055085
152	TraesCS6A01G286900LC	TraesCS6A01G286900LC.1	1	--*	tr|M8C8Z6|M8C8Z6_AEGTA	Mitochondrial inner membrane protein OXA1				G
153	TraesCS6A01G297500	TraesCS6A01G297500.1	1	***	tr|M8BJE3|M8BJE3_AEGTA	Blue copper protein	PF02298: Plastocyanin-like domain	IPR003245: Phytocyanin domain; IPR008972: Cupredoxin; IPR028871: Blue (type 1) copper protein, binding site	GO:0009055 MF: electron carrier activity	G	PF02298	IPR003245; IPR008972; IPR028871	GO:0009055
154	TraesCS6A01G303200	TraesCS6A01G303200.2	0	***	tr|W5G7W3|W5G7W3_WHEAT	Alpha-galactosidase	PF16499: Alpha galactosidase A	IPR002241: Glycoside hydrolase, family 27; IPR013785: Aldolase-type TIM barrel; IPR017853: Glycoside hydrolase superfamily	GO:0003824 MF: catalytic activity;GO:0004553 MF: hydrolase activity, hydrolyzing O-glycosyl compounds;GO:0005975 BP: carbohydrate metabolic process	G	PF16499	IPR002241; IPR013785; IPR017853	GO:0003824; GO:0004553; GO:0005975
155	TraesCS6A01G303200	TraesCS6A01G303200.1	1	***	tr|W5G7W3|W5G7W3_WHEAT	Alpha-galactosidase	PF16499: Alpha galactosidase A	IPR000772: Ricin B, lectin domain; IPR002241: Glycoside hydrolase, family 27; IPR013785: Aldolase-type TIM barrel; IPR017853: Glycoside hydrolase superfamily	GO:0003824 MF: catalytic activity;GO:0004553 MF: hydrolase activity, hydrolyzing O-glycosyl compounds;GO:0005975 BP: carbohydrate metabolic process	G	PF16499	IPR000772; IPR002241; IPR013785; IPR017853	GO:0003824; GO:0004553; GO:0005975
156	TraesCS6A01G325600	TraesCS6A01G325600.1	1	***	tr|M8CMB2|M8CMB2_AEGTA	1-aminocyclopropane-1-carboxylate oxidase	PF14226: non-haem dioxygenase in morphine synthesis N-terminal; PF03171: 2OG-Fe(II) oxygenase superfamily	IPR005123: Oxoglutarate/iron-dependent dioxygenase; IPR026992: Non-haem dioxygenase N-terminal domain; IPR027443: Isopenicillin N synthase-like	GO:0016491 MF: oxidoreductase activity;GO:0055114 BP: oxidation-reduction process	G	PF14226; PF03171	IPR005123; IPR026992; IPR027443	GO:0016491; GO:0055114
157	TraesCS6A01G371300LC	TraesCS6A01G371300LC.1	1	--*	sp|A1RRV9|RL14_PYRIL	50S ribosomal protein L14				G
158	TraesCS6A01G402900	TraesCS6A01G402900.1	1	--*	tr|A0A1J3JCE9|A0A1J3JCE9_NOCCA	Gag polyprotein	PF00098: Zinc knuckle	IPR001878: Zinc finger, CCHC-type	GO:0003676 MF: nucleic acid binding;GO:0008270 MF: zinc ion binding	TE	PF00098	IPR001878	GO:0003676; GO:0008270
159	TraesCS6A01G503500LC	TraesCS6A01G503500LC.1	1	--*	AT4G35900.2	Basic-leucine zipper (bZIP) transcription factor family protein				G
160	TraesCS6A01G538700LC	TraesCS6A01G538700LC.1	1	*-*	tr|B6TCI3|B6TCI3_MAIZE	ADP,ATP carrier protein		IPR002067: Mitochondrial carrier protein; IPR014729: Rossmann-like alpha/beta/alpha sandwich fold	GO:0055085 BP: transmembrane transport	G		IPR002067; IPR014729	GO:0055085
161	TraesCS6B01G180600	TraesCS6B01G180600.1	1	--*	sp|Q5RCP7|CEP76_PONAB	Centrosomal protein of 76 kDa				G
162	TraesCS6B01G211500	TraesCS6B01G211500.1	1	***	tr|A0A1D6B0X9|A0A1D6B0X9_WHEAT	CASP-like protein	PF04535: Domain of unknown function (DUF588)	IPR006702: Domain of unknown function DUF588		G	PF04535	IPR006702
163	TraesCS6B01G257800	TraesCS6B01G257800.1	1	***	tr|B9GW56|B9GW56_POPTR	Kinase family protein	PF00069: Protein kinase domain	IPR000719: Protein kinase domain; IPR008271: Serine/threonine-protein kinase, active site; IPR011009: Protein kinase-like domain; IPR017441: Protein kinase, ATP binding site	GO:0004672 MF: protein kinase activity;GO:0005524 MF: ATP binding;GO:0006468 BP: protein phosphorylation	G	PF00069	IPR000719; IPR008271; IPR011009; IPR017441	GO:0004672; GO:0005524; GO:0006468
164	TraesCS6B01G281500	TraesCS6B01G281500.1	1	***	tr|Q9M587|Q9M587_MAIZE	Prohibitin	PF01145: SPFH domain / Band 7 family	IPR000163: Prohibitin; IPR001107: Band 7 domain	GO:0016020 CC: membrane	G	PF01145	IPR000163; IPR001107	GO:0016020
165	TraesCS6B01G355800	TraesCS6B01G355800.1	1	***	tr|M8CMB2|M8CMB2_AEGTA	1-aminocyclopropane-1-carboxylate oxidase	PF03171: 2OG-Fe(II) oxygenase superfamily	IPR005123: Oxoglutarate/iron-dependent dioxygenase; IPR027443: Isopenicillin N synthase-like	GO:0016491 MF: oxidoreductase activity;GO:0055114 BP: oxidation-reduction process	G	PF03171	IPR005123; IPR027443	GO:0016491; GO:0055114
166	TraesCS6B01G477100LC	TraesCS6B01G477100LC.3	0	*-*	tr|W5FYM2|W5FYM2_WHEAT	Phosphoglycolate phosphatase				G
167	TraesCS6B01G477100LC	TraesCS6B01G477100LC.1	0	*-*	tr|W5FYM2|W5FYM2_WHEAT	Phosphoglycolate phosphatase				G
168	TraesCS6B01G477100LC	TraesCS6B01G477100LC.2	1	*-*	tr|W5FYM2|W5FYM2_WHEAT	Phosphoglycolate phosphatase				G
169	TraesCS6B01G617400LC	TraesCS6B01G617400LC.1	1	--*	tr|A0A0B0NAC2|A0A0B0NAC2_GOSAR	3-ketoacyl-CoA thiolase 2, peroxisomal-like protein				G
170	TraesCS6B01G617600LC	TraesCS6B01G617600LC.1	1	--*	sp|Q9Z0R4|ITSN1_MOUSE	Intersectin-1				G
171	TraesCS6B01G753400LC	TraesCS6B01G753400LC.1	0	--*	AT4G30250.2	P-loop containing nucleoside triphosphate hydrolases superfamily protein				G
172	TraesCS6B01G753400LC	TraesCS6B01G753400LC.2	1	--*	AT4G30250.2	P-loop containing nucleoside triphosphate hydrolases superfamily protein				G
173	TraesCS6B01G775200LC	TraesCS6B01G775200LC.1	1	*-*	tr|A0A1J3HNP1|A0A1J3HNP1_NOCCA	Glutathione S-transferase T3				G
174	TraesCS6D01G098600	TraesCS6D01G098600.1	1	***	tr|I1HX28|I1HX28_BRADI	Terpene cyclase/mutase family member	PF13249: Squalene-hopene cyclase N-terminal domain; PF13243: Squalene-hopene cyclase C-terminal domain	IPR008930: Terpenoid cyclases/protein prenyltransferase alpha-alpha toroid; IPR018333: Squalene cyclase; IPR032696: Squalene cyclase, C-terminal; IPR032697: Squalene cyclase, N-terminal	GO:0016866 MF: intramolecular transferase activity	G	PF13249; PF13243	IPR008930; IPR018333; IPR032696; IPR032697	GO:0016866
175	TraesCS6D01G098600	TraesCS6D01G098600.2	0	***	tr|A0A0Q3F112|A0A0Q3F112_BRADI	Terpene cyclase/mutase family member	PF13249: Squalene-hopene cyclase N-terminal domain; PF13243: Squalene-hopene cyclase C-terminal domain	IPR008930: Terpenoid cyclases/protein prenyltransferase alpha-alpha toroid; IPR018333: Squalene cyclase; IPR032696: Squalene cyclase, C-terminal; IPR032697: Squalene cyclase, N-terminal	GO:0016866 MF: intramolecular transferase activity	G	PF13249; PF13243	IPR008930; IPR018333; IPR032696; IPR032697	GO:0016866
176	TraesCS6D01G328900LC	TraesCS6D01G328900LC.1	1	--*	AT5G05800.5	Myb/SANT-like DNA-binding domain protein				G
177	TraesCS6D01G343600LC	TraesCS6D01G343600LC.1	1	--*	tr|D9ZDG0|D9ZDG0_9MAGN	Ycf1		IPR011989: Armadillo-like helical		G		IPR011989
178	TraesCS6D01G384800LC	TraesCS6D01G384800LC.1	1	***	tr|M8B4Q7|M8B4Q7_AEGTA	Anaphase-promoting complex subunit 10	PF03256: Anaphase-promoting complex, subunit 10 (APC10)	IPR004939: APC10/DOC domain; IPR008979: Galactose-binding domain-like		G	PF03256	IPR004939; IPR008979
179	TraesCS7A01G075600	TraesCS7A01G075600.1	1	***	tr|B6T3P9|B6T3P9_MAIZE	Enolase	PF03952: Enolase, N-terminal domain; PF00113: Enolase, C-terminal TIM barrel domain	IPR000941: Enolase; IPR020809: Enolase, conserved site; IPR020810: Enolase, C-terminal TIM barrel domain; IPR020811: Enolase, N-terminal; IPR029017: Enolase N-terminal domain-like; IPR029065: Enolase C-terminal domain-like	GO:0000015 CC: phosphopyruvate hydratase complex;GO:0000287 MF: magnesium ion binding;GO:0004634 MF: phosphopyruvate hydratase activity;GO:0006096 BP: glycolytic process	G	PF03952; PF00113	IPR000941; IPR020809; IPR020810; IPR020811; IPR029017; IPR029065	GO:0000015; GO:0000287; GO:0004634; GO:0006096
180	TraesCS7A01G177700	TraesCS7A01G177700.1	1	***	tr|B9SSG1|B9SSG1_RICCO	Heat-shock protein, putative	PF00011: Hsp20/alpha crystallin family	IPR002068: Alpha crystallin/Hsp20 domain; IPR008978: HSP20-like chaperone		G	PF00011	IPR002068; IPR008978
181	TraesCS7A01G238500LC	TraesCS7A01G238500LC.1	1	--*	sp|Q2K3F0|SUCC_RHIEC	Succinate--CoA ligase [ADP-forming] subunit beta				G
182	TraesCS7A01G249500	TraesCS7A01G249500.1	1	--*	AT4G10120.3	Sucrose-phosphate synthase family protein				G
183	TraesCS7A01G300900	TraesCS7A01G300900.1	1	--*	AT4G25225.2	transmembrane protein	PF15054: Domain of unknown function (DUF4535)	IPR027854: Protein of unknown function DUF4535		G	PF15054	IPR027854
184	TraesCS7A01G314400LC	TraesCS7A01G314400LC.1	1	--*	AT3G52350.1	D111/G-patch domain-containing protein				G
185	TraesCS7A01G391000	TraesCS7A01G391000.1	1	***	tr|W0TUG3|W0TUG3_ACAMN	Pleiotropic drug resistance ABC transporter	PF14510: ABC-transporter extracellular N-terminal; PF00005: ABC transporter; PF01061: ABC-2 type transporter; PF08370: Plant PDR ABC transporter associated	IPR003439: ABC transporter-like; IPR003593: AAA+ ATPase domain; IPR013525: ABC-2 type transporter; IPR013581: Plant PDR ABC transporter associated; IPR027417: P-loop containing nucleoside triphosphate hydrolase; IPR029481: ABC-transporter extracellular N-terminal domain	GO:0005524 MF: ATP binding;GO:0016020 CC: membrane;GO:0016887 MF: ATPase activity	G	PF14510; PF00005; PF01061; PF08370	IPR003439; IPR003593; IPR013525; IPR013581; IPR027417; IPR029481	GO:0005524; GO:0016020; GO:0016887
186	TraesCS7A01G415900	TraesCS7A01G415900.1	1	--*	sp|A1R516|IF2_ARTAT	Translation initiation factor IF-2				G
187	TraesCS7A01G420900LC	TraesCS7A01G420900LC.1	1	*-*	AT5G41190.1	RNA-binding NOB1-like protein				G
188	TraesCS7A01G468000	TraesCS7A01G468000.1	1	-**	tr|G7LEC4|G7LEC4_MEDTR	Pathogenic type III effector avirulence factor Avr AvrRpt-cleavage: cleavage site protein				G
189	TraesCS7A01G561900LC	TraesCS7A01G561900LC.1	1	--*	sp|A8LSF0|AROA_DINSH	3-phosphoshikimate 1-carboxyvinyltransferase				G
190	TraesCS7B01G032600	TraesCS7B01G032600.1	1	-**	AT5G02220.1	cyclin-dependent kinase inhibitor				G
191	TraesCS7B01G086800LC	TraesCS7B01G086800LC.1	1	--*	sp|Q6BRV5|PAN3_DEBHA	PAB-dependent poly(A)-specific ribonuclease subunit PAN3				G
192	TraesCS7B01G122500	TraesCS7B01G122500.1	1	***	tr|Q9AVM3|Q9AVM3_WHEAT	Cytochrome P450	PF00067: Cytochrome P450	IPR001128: Cytochrome P450; IPR002401: Cytochrome P450, E-class, group I; IPR017972: Cytochrome P450, conserved site	GO:0005506 MF: iron ion binding;GO:0016705 MF: oxidoreductase activity, acting on paired donors, with incorporation or reduction of molecular oxygen;GO:0020037 MF: heme binding;GO:0055114 BP: oxidation-reduction process	G	PF00067	IPR001128; IPR002401; IPR017972	GO:0005506; GO:0016705; GO:0020037; GO:0055114
193	TraesCS7B01G478000	TraesCS7B01G478000.1	1	***	tr|D7LBV7|D7LBV7_ARALL	SPX domain-containing protein	PF03105: SPX domain	IPR004331: SPX domain		G	PF03105	IPR004331
194	TraesCS7B01G660700LC	TraesCS7B01G660700LC.1	1	*-*	tr|A0A072VGT5|A0A072VGT5_MEDTR	Vacuolar-sorting receptor				G
195	TraesCS7D01G055000LC	TraesCS7D01G055000LC.1	1	--*	AT2G23760.3	BEL1-like homeodomain 4				G
196	TraesCS7D01G071200	TraesCS7D01G071200.1	1	***	tr|B6T3P9|B6T3P9_MAIZE	Enolase	PF03952: Enolase, N-terminal domain; PF00113: Enolase, C-terminal TIM barrel domain	IPR000941: Enolase; IPR020809: Enolase, conserved site; IPR020810: Enolase, C-terminal TIM barrel domain; IPR020811: Enolase, N-terminal; IPR029017: Enolase N-terminal domain-like; IPR029065: Enolase C-terminal domain-like	GO:0000015 CC: phosphopyruvate hydratase complex;GO:0000287 MF: magnesium ion binding;GO:0004634 MF: phosphopyruvate hydratase activity;GO:0006096 BP: glycolytic process	G	PF03952; PF00113	IPR000941; IPR020809; IPR020810; IPR020811; IPR029017; IPR029065	GO:0000015; GO:0000287; GO:0004634; GO:0006096
197	TraesCS7D01G101400LC	TraesCS7D01G101400LC.1	1	*-*	tr|A0A1J3DW99|A0A1J3DW99_NOCCA	Retrovirus-related Pol polyprotein from transposon TNT 1-94				TE
198	TraesCS7D01G118200	TraesCS7D01G118200.1	1	***	tr|A0A1D6CGH8|A0A1D6CGH8_WHEAT	Histone H3	PF00125: Core histone H2A/H2B/H3/H4	IPR000164: Histone H3/CENP-A; IPR007125: Histone H2A/H2B/H3; IPR009072: Histone-fold	GO:0000786 CC: nucleosome;GO:0003677 MF: DNA binding;GO:0046982 MF: protein heterodimerization activity	G	PF00125	IPR000164; IPR007125; IPR009072	GO:0000786; GO:0003677; GO:0046982
199	TraesCS7D01G179500	TraesCS7D01G179500.1	1	***	tr|B9SSG1|B9SSG1_RICCO	Heat-shock protein, putative	PF00011: Hsp20/alpha crystallin family	IPR002068: Alpha crystallin/Hsp20 domain; IPR008978: HSP20-like chaperone		G	PF00011	IPR002068; IPR008978
200	TraesCS7D01G191000	TraesCS7D01G191000.1	1	***	tr|D6N9X1|D6N9X1_PLAMJ	Progesterone 5-beta-reductase		IPR016040: NAD(P)-binding domain		G		IPR016040
201	TraesCS7D01G192000LC	TraesCS7D01G192000LC.1	1	--*	sp|P28463|HEM1_SYNY3	Glutamyl-tRNA reductase				G
202	TraesCS7D01G287400	TraesCS7D01G287400.1	1	***	tr|B9SFZ5|B9SFZ5_RICCO	Rer1 protein, putative	PF03248: Rer1 family	IPR004932: Retrieval of early ER protein Rer1	GO:0016021 CC: integral component of membrane	G	PF03248	IPR004932	GO:0016021
203	TraesCS7D01G372600	TraesCS7D01G372600.1	1	***	tr|B9IMZ5|B9IMZ5_POPTR	SPX domain-containing family protein	PF03105: SPX domain	IPR004331: SPX domain		G	PF03105	IPR004331
204	TraesCS7D01G504000LC	TraesCS7D01G504000LC.1	1	--*	AT5G45520.2	Leucine-rich repeat (LRR) family protein				G
205	TraesCSU01G094800	TraesCSU01G094800.1	1	***	tr|D7LBV7|D7LBV7_ARALL	SPX domain-containing protein	PF03105: SPX domain	IPR004331: SPX domain		G	PF03105	IPR004331
206	TraesCSU01G182300	TraesCSU01G182300.1	1	***	tr|A0A151SUI8|A0A151SUI8_CAJCA	Histone H3	PF00125: Core histone H2A/H2B/H3/H4	IPR000164: Histone H3/CENP-A; IPR007125: Histone H2A/H2B/H3; IPR009072: Histone-fold	GO:0000786 CC: nucleosome;GO:0003677 MF: DNA binding;GO:0046982 MF: protein heterodimerization activity	G	PF00125	IPR000164; IPR007125; IPR009072	GO:0000786; GO:0003677; GO:0046982
207	TraesCSU01G351600LC	TraesCSU01G351600LC.1	1	*-*	tr|M8C480|M8C480_AEGTA	U4/U6.U5 tri-snRNP-associated protein 2				G
208	TraesCSU01G386700LC	TraesCSU01G386700LC.1	1	--*	AT3G11960.4	Cleavage and polyadenylation specificity factor (CPSF) A subunit protein				G
209	TraesCSU01G576500LC	TraesCSU01G576500LC.1	1	***	tr|A0A061G5I4|A0A061G5I4_THECC	HAT transposon superfamily	PF04937: Protein of unknown function (DUF 659)	IPR007021: Domain of unknown function DUF659; IPR012337: Ribonuclease H-like domain	GO:0003676 MF: nucleic acid binding	TE	PF04937	IPR007021; IPR012337	GO:0003676
