# Supplementary material for: Genome-Wide Transcription During Early Wheat Meiosis Is Independent of Synapsis, Ploidy Level, and the Ph1 Locus
Source: Front Plant Sci. 2018 Dec 4;9:1791. doi: 10.3389/fpls.2018.01791 (PMC6288783; doi:10.3389/fpls.2018.01791)
Supplement: TABLE S7 — Functional annotation of the 33 DEGs shared by all samples lacking Ph1 vs. all samples containing Ph1, and which are not located in any of the common deletions present in all samples lacking Ph1. [file Table_7.XLSX]

## Sheet: not in the deletions
TABLE S7 Functional annotation of the 33 DEG shared by all samples containing Ph1 vs. all samples lacking Ph1, and which are not located in any of the common deletions present in all samples lacking Ph1 (on 3A, 3B and 5B ).
Gene ID	Gene.ID	is_repr	AHRD.Quality.Code	Blast.Hit. Accession	Human.Readable.Description	Pfam.IDs..Description.	Interpro.IDs..Description.	GO.IDs..Description..via.Interpro	Gene.or.TE.TE..U..via.function.	Pfam.IDs	Interpro.IDs	GO.IDs.via.Interpro	DEG
TraesCS5A01G284800LC	TraesCS5A01G284800LC.1	1	*-*	tr|Q946U8|Q946U8_MAIZE	Long cell-linked locus protein				G				DOWN
TraesCS6D01G038100LC	TraesCS6D01G038100LC.1	0	***	tr|Q653D7|Q653D7_ORYSJ	Molybdenum cofactor sulfurase protein-like	PF03476: MOSC N-terminal beta barrel domain; PF03473: MOSC domain	IPR005302: Molybdenum cofactor sulfurase, C-terminal; IPR005303: MOSC, N-terminal beta barrel	GO:0003824 MF: catalytic activity;GO:0030151 MF: molybdenum ion binding;GO:0030170 MF: pyridoxal phosphate binding	G	PF03476; PF03473	IPR005302; IPR005303	GO:0003824; GO:0030151; GO:0030170	DOWN
TraesCS1A01G063900LC	TraesCS1A01G063900LC.1	1	*-*	sp|Q09353|SENP_CAEEL	Sentrin-specific protease	PF02902: Ulp1 protease family, C-terminal catalytic domain	IPR003653: Ulp1 protease family, C-terminal catalytic domain	GO:0006508 BP: proteolysis;GO:0008234 MF: cysteine-type peptidase activity	G	PF02902	IPR003653	GO:0006508; GO:0008234
TraesCS1B01G291000LC	TraesCS1B01G291000LC.1	1	--*	AT1G45201.2	triacylglycerol lipase-like 1				G				UP
TraesCS2B01G608200LC	TraesCS2B01G608200LC.1	1	*-*	tr|Q53LY3|Q53LY3_ORYSJ	Transposon protein, putative, Pong sub-class, expressed				TE				UP
TraesCS5A01G015300LC	TraesCS5A01G015300LC.1	1	--*	tr|Q9MVW0|Q9MVW0_9SPER	Maturase K				G				UP
TraesCS5A01G031200LC	TraesCS5A01G031200LC.1	1	*-*	tr|Q2QSD3|Q2QSD3_ORYSJ	Retrotransposon protein, putative, unclassified				TE				UP
TraesCS5A01G281100LC	TraesCS5A01G281100LC.1	1	*-*	tr|M8CI37|M8CI37_AEGTA	Aldehyde dehydrogenase family 2 member B4, mitochondrial				G				UP
TraesCS6A01G095200LC	TraesCS6A01G095200LC.1	1	*-*	tr|Q2R316|Q2R316_ORYSJ	Transposon protein, putative, CACTA, En/Spm sub-class	PF03004: Plant transposase (Ptta/En/Spm family)	IPR004252: Probable transposase, Ptta/En/Spm, plant		TE	PF03004	IPR004252		UP
TraesCS6B01G322600LC	TraesCS6B01G322600LC.1	1	--*	AT3G01510.3	like SEX4 1				G				UP
TraesCS6B01G726000LC	TraesCS6B01G726000LC.1	1	***	tr|A0A061G5I4|A0A061G5I4_THECC	HAT transposon superfamily	PF04937: Protein of unknown function (DUF 659)	IPR007021: Domain of unknown function DUF659; IPR012337: Ribonuclease H-like domain	GO:0003676 MF: nucleic acid binding	TE	PF04937	IPR007021; IPR012337	GO:0003676	UP
TraesCS7A01G080500LC	TraesCS7A01G080500LC.1	1	*-*	tr|Q6USA0|Q6USA0_9POAL	Transposase	PF13359: DDE superfamily endonuclease	IPR027806: Harbinger transposase-derived nuclease domain		TE	PF13359	IPR027806		UP
TraesCSU01G120200LC	TraesCSU01G120200LC.1	1	***	tr|M8AAY9|M8AAY9_TRIUA	Splicing factor U2af small subunit A	PF00642: Zinc finger C-x8-C-x5-C-x3-H type (and similar); PF00076: RNA recognition motif. (a.k.a. RRM, RBD, or RNP domain)	IPR000504: RNA recognition motif domain; IPR000571: Zinc finger, CCCH-type; IPR003954: RNA recognition motif domain, eukaryote; IPR009145: U2 auxiliary factor small subunit	GO:0000398 BP: mRNA splicing, via spliceosome;GO:0003676 MF: nucleic acid binding;GO:0003723 MF: RNA binding;GO:0046872 MF: metal ion binding;GO:0089701 CC: U2AF	G	PF00642; PF00076	IPR000504; IPR000571; IPR003954; IPR009145	GO:0000398; GO:0003676; GO:0003723; GO:0046872; GO:0089701
TraesCSU01G419000LC	TraesCSU01G419000LC.2	1	***	tr|A0A061G5I4|A0A061G5I4_THECC	HAT transposon superfamily	PF04937: Protein of unknown function (DUF 659); PF05699: hAT family C-terminal dimerisation region	IPR007021: Domain of unknown function DUF659; IPR008906: HAT, C-terminal dimerisation domain; IPR012337: Ribonuclease H-like domain	GO:0003676 MF: nucleic acid binding;GO:0046983 MF: protein dimerization activity	TE	PF04937; PF05699	IPR007021; IPR008906; IPR012337	GO:0003676; GO:0046983	UP
TraesCSU01G639100LC	TraesCSU01G639100LC.1	1	***	tr|M8AAY9|M8AAY9_TRIUA	Splicing factor U2af small subunit A	PF00642: Zinc finger C-x8-C-x5-C-x3-H type (and similar); PF00076: RNA recognition motif. (a.k.a. RRM, RBD, or RNP domain)	IPR000504: RNA recognition motif domain; IPR000571: Zinc finger, CCCH-type; IPR003954: RNA recognition motif domain, eukaryote; IPR009145: U2 auxiliary factor small subunit	GO:0000398 BP: mRNA splicing, via spliceosome;GO:0003676 MF: nucleic acid binding;GO:0003723 MF: RNA binding;GO:0046872 MF: metal ion binding;GO:0089701 CC: U2AF	G	PF00642; PF00076	IPR000504; IPR000571; IPR003954; IPR009145	GO:0000398; GO:0003676; GO:0003723; GO:0046872; GO:0089701
TraesCS2D01G117500	TraesCS2D01G117500.2	1	***	tr|Q6K268|Q6K268_ORYSJ	Ankyrin repeat protein-like	PF12796: Ankyrin repeats (3 copies); PF00515: Tetratricopeptide repeat	IPR001440: Tetratricopeptide repeat 1; IPR002110: Ankyrin repeat; IPR011990: Tetratricopeptide-like helical domain; IPR013026: Tetratricopeptide repeat-containing domain; IPR019734: Tetratricopeptide repeat; IPR020683: Ankyrin repeat-containing domain	GO:0005515 MF: protein binding	G	PF12796; PF00515	IPR001440; IPR002110; IPR011990; IPR013026; IPR019734; IPR020683	GO:0005515	DOWN
TraesCS5A01G208500	TraesCS5A01G208500.2	1	***	AT4G13985.1	FBD-associated F-box protein								DOWN
TraesCS1D01G041200	TraesCS1D01G041200.1	1	***	tr|M8C4I9|M8C4I9_AEGTA	Glucose-6-phosphate isomerase								UP
TraesCS2A01G557600	TraesCS2A01G557600.1	1	***	AT1G71900.1	magnesium transporter, putative (DUF803)	PF05653: Magnesium transporter NIPA	IPR008521: Magnesium transporter NIPA	GO:0015095 MF: magnesium ion transmembrane transporter activity;GO:0015693 BP: magnesium ion transport;GO:0016021 CC: integral component of membrane	G	PF05653	IPR008521	GO:0015095; GO:0015693; GO:0016021
TraesCS2A01G557700	TraesCS2A01G557700.1	1	*-*	tr|B9R7J2|B9R7J2_RICCO	Signal peptidase I, putative								UP
TraesCS2A01G561600	TraesCS2A01G561600.1	1	*-*	AT5G22750.1	DNA/RNA helicase protein	PF00176: SNF2 family N-terminal domain; PF00271: Helicase conserved C-terminal domain	IPR000330: SNF2-related, N-terminal domain; IPR001650: Helicase, C-terminal; IPR014001: Helicase superfamily 1/2, ATP-binding domain; IPR027417: P-loop containing nucleoside triphosphate hydrolase	GO:0005524 MF: ATP binding	TE?	PF00176; PF00271	IPR000330; IPR001650; IPR014001; IPR027417	GO:0005524	UP
TraesCS2B01G436500	TraesCS2B01G436500.1	1	***	tr|K7VQC2|K7VQC2_MAIZE	Histone H4	PF15511: Centromere kinetochore component CENP-T histone fold	IPR001951: Histone H4; IPR009072: Histone-fold; IPR019809: Histone H4, conserved site	GO:0000786 CC: nucleosome;GO:0003677 MF: DNA binding;GO:0005634 CC: nucleus;GO:0006334 BP: nucleosome assembly;GO:0046982 MF: protein heterodimerization activity	G	PF15511	IPR001951; IPR009072; IPR019809	GO:0000786; GO:0003677; GO:0005634; GO:0006334; GO:0046982	UP
TraesCS3D01G165100	TraesCS3D01G165100.1	0	***	tr|M8CQV7|M8CQV7_AEGTA	B3 domain-containing protein	PF02362: B3 DNA binding domain	IPR003340: B3 DNA binding domain; IPR015300: DNA-binding pseudobarrel domain	GO:0003677 MF: DNA binding	G	PF02362	IPR003340; IPR015300	GO:0003677	UP
TraesCS4A01G313000	TraesCS4A01G313000.2	1	*-*	tr|A0A151RET9|A0A151RET9_CAJCA	Retrovirus-related Pol polyprotein from transposon TNT 1-94	PF14223: gag-polypeptide of LTR copia-type			TE	PF14223			UP
TraesCS4B01G275600	TraesCS4B01G275600.1	1	*-*	tr|A0A151RET9|A0A151RET9_CAJCA	Retrovirus-related Pol polyprotein from transposon TNT 1-94	PF14223: gag-polypeptide of LTR copia-type	IPR001878: Zinc finger, CCHC-type	GO:0003676 MF: nucleic acid binding;GO:0008270 MF: zinc ion binding	TE	PF14223	IPR001878	GO:0003676; GO:0008270	UP
TraesCS7B01G152800	TraesCS7B01G152800.2	0	***	tr|A0A0H3YBR5|A0A0H3YBR5_SALMI	Basic helix-loop-helix transcription factor	PF00010: Helix-loop-helix DNA-binding domain	IPR011598: Myc-type, basic helix-loop-helix (bHLH) domain	GO:0046983 MF: protein dimerization activity	G	PF00010	IPR011598	GO:0046983	UP
TraesCSU01G088100	TraesCSU01G088100.1	1	--*	AT1G20920.7	P-loop containing nucleoside triphosphate hydrolases superfamily protein				G				UP
TraesCS3B01G385800	TraesCS3B01G385800.1	1	***	tr|Q7XH18|Q7XH18_ORYSJ	F-box domain containing protein, expressed				TE?
TraesCS3B01G421600	TraesCS3B01G421600.1	1	***	tr|M8CI89|M8CI89_AEGTA	Transcription initiation factor TFIID subunit 9	PF02291: Transcription initiation factor IID, 31kD subunit	IPR003162: Transcription initiation factor TAFII31; IPR009072: Histone-fold	GO:0006352 BP: DNA-templated transcription, initiation;GO:0046982 MF: protein heterodimerization activity	G	PF02291	IPR003162; IPR009072	GO:0006352; GO:0046982	DOWN
TraesCS3B01G582400	TraesCS3B01G582400.2	0	***	tr|R7W0U9|R7W0U9_AEGTA	General transcription factor IIE subunit 1	PF02002: TFIIE alpha subunit	IPR002853: Transcription initiation factor IIE subunit alpha, N-terminal; IPR011991: Winged helix-turn-helix DNA-binding domain; IPR017919: Transcription factor TFE/TFIIEalpha HTH domain; IPR024550: TFIIEalpha/SarR/Rpc3 HTH domain	GO:0006367 BP: transcription initiation from RNA polymerase II promoter;GO:0043565 MF: sequence-specific DNA binding	G	PF02002	IPR002853; IPR011991; IPR017919; IPR024550	GO:0006367; GO:0043565
TraesCS5B01G108600	TraesCS5B01G108600.1	1	***	tr|A0A1D5ZHG4|A0A1D5ZHG4_WHEAT	Eukaryotic translation initiation factor 5A	PF01287: Eukaryotic elongation factor 5A hypusine, DNA-binding OB fold	IPR001884: Translation elongation factor IF5A; IPR008991: Translation protein SH3-like domain; IPR012340: Nucleic acid-binding, OB-fold; IPR014722: Ribosomal protein L2 domain 2; IPR019769: Translation elongation factor, IF5A, hypusine site; IPR020189: Translation elongation factor, IF5A C-terminal	GO:0003723 MF: RNA binding;GO:0003746 MF: translation elongation factor activity;GO:0006452 BP: translational frameshifting;GO:0043022 MF: ribosome binding;GO:0045901 BP: positive regulation of translational elongation;GO:0045905 BP: positive regulation of translational termination	G	PF01287	IPR001884; IPR008991; IPR012340; IPR014722; IPR019769; IPR020189	GO:0003723; GO:0003746; GO:0006452; GO:0043022; GO:0045901; GO:0045905
TraesCS5B01G192100	TraesCS5B01G192100.1	1	--*	AT5G48000.7	cytochrome P450, family 708, subfamily A, polypeptide 2	PF07893: Protein of unknown function (DUF1668)	IPR012871: Protein of unknown function DUF1677, Oryza sativa		G	PF07893	IPR012871
TraesCS5B01G333900LC	TraesCS5B01G333900LC.1	1	--*	sp|Q3UHB1|NT5D3_MOUSE	5'-nucleotidase domain-containing protein 3				G
