# Supplementary material for: Genome-Wide Transcription During Early Wheat Meiosis Is Independent of Synapsis, Ploidy Level, and the Ph1 Locus
Source: Front Plant Sci. 2018 Dec 4;9:1791. doi: 10.3389/fpls.2018.01791 (PMC6288783; doi:10.3389/fpls.2018.01791)
Supplement: TABLE S8 — Chromosome configuration of nine newly synthesized triticale both containing the Ph1 locus (Ph1+) and lacking it (Ph1-). No inter-genomic recombination was detected in the presence of Ph1. [file Table_8.XLSX]

## Sheet: WWRR+
Online Resource 7 Chromosome configuration of nine newly synthesized triticale (in the presence of the Ph1 locus).
Parental triticale	Progeny	aChromosome number	Chromosomal genome composition	Recombination events	Other reorganizations
Triticale - replicate 1	1	56	14A/ 14B/ 14D/ 14R	0	None
	2	56	14A/ 14B/ 14D/ 14R	0	None
	3	55 + t'	14A/ 14B/ 14D/ 13 + t'R	0	t'R
Triticale - replicate 2	1	56	14A/ 14B/ 14D/ 14R	0	None
	2	55	13A/ 15B/ 12D/ 13R	0	None
	3	54 + t'	14A/ 14B/ 14D/ 12 + t'R	0	t'R
Triticale - replicate 3	1	56	14A/ 14B/ 14D/ 14R	0	None
	2	56	14A/ 14B/ 14D/ 14R	0	None
	3	56	14A/ 14B/ 14D/ 14R	0	None
a Nomenclature suggested by Raupp et al. (1995) for the genetic stocks of wheat and its relatives

## Sheet: WWRR-
Online Resource 8 Chromosome configuration of nine newly synthesized triticale in the absence of the Ph1 locus.
Parental triticale	Progeny	aChromosome number	Chromosomal genome composition	Recombination events	Other reorganizations
Triticale lacking Ph1 - replicate 1	1	54	13A/ 14B/ 11D/ 15R	11	None
	2	51	14A/ 13B/ 11D/ 13R	4	None
	3	53	14A/ 15B/ 11D/ 13R	5	None
Triticale lacking Ph1 - replicate 2	1	52 + t''	12A/ 14 + t'B/ 11D/ 11 + t'R/ + TB∙R	14	TB∙R + t'R + t'B
	2	54	13A/ 15B/ 12D/ 14R	16	None
	3	51	10A/ 12B/ 16D/ 13R	11	None
Triticale lacking Ph1 not used for RNA-seq nc=57	1	54	13A/ 14B/ 14D/ 13R	7	None
	2	59 + t'	14A/ 15B/ 17D/ 13 + t'R	13	t'R
	3	53	12A/ 13B/ 15D/ 13R	8	None
a Nomenclature suggested by Raupp et al. (1995) for the genetic stocks of wheat and its relatives

## Sheet: Table
TABLE S8 Chromosome configuration of nine newly synthesized triticale both containing (Ph1+) and lacking (Ph1-) the Ph1 locus. No inter-genomic recombination was detected in the presence of Ph1.
Parental triticale	Progeny	aChromosome number	Chromosomal genome composition	Recombination events	Other reorganizations
Triticale Ph1+ replicate 1	1	56	14A/ 14B/ 14D/ 14R	0	None
	2	56	14A/ 14B/ 14D/ 14R	0	None
	3	55 + t'	14A/ 14B/ 14D/ 13 + t'R	0	t'R
Triticale Ph1+ replicate 2	1	56	14A/ 14B/ 14D/ 14R	0	None
	2	55	13A/ 15B/ 12D/ 13R	0	None
	3	54 + t'	14A/ 14B/ 14D/ 12 + t'R	0	t'R
Triticale Ph1+ replicate 3	1	56	14A/ 14B/ 14D/ 14R	0	None
	2	56	14A/ 14B/ 14D/ 14R	0	None
	3	56	14A/ 14B/ 14D/ 14R	0	None
Triticale Ph1- replicate 1	1	54	13A/ 14B/ 11D/ 15R	11	None
	2	51	14A/ 13B/ 11D/ 13R	4	None
	3	53	14A/ 15B/ 11D/ 13R	5	None
Triticale Ph1- replicate 2	1	52 + t''	12A/ 14 + t'B/ 11D/ 11 + t'R/ + TB∙R	14	TB∙R + t'R + t'B
	2	54	13A/ 15B/ 12D/ 14R	16	None
	3	51	10A/ 12B/ 16D/ 13R	11	None
Triticale Ph1- not used for RNA-seq nc=57	1	54	13A/ 14B/ 14D/ 13R	7	None
	2	59 + t'	14A/ 15B/ 17D/ 13 + t'R	13	t'R
	3	53	12A/ 13B/ 15D/ 13R	8	None
a Nomenclature suggested by Raupp et al., (1995) for the genetic stocks of wheat and its relatives
